# Supplementary material for: Droplet-Based Microfluidic Photobioreactor (µ-PBR) as a Growth Optimization Tool for Cyanobacteria and Microalgae
Source: Preprints.org preprint supplement (doi:10.20944/preprints202410.0943.v1), 2024-10-11
Supplement: Supplementary file 1 [file supplementary]

## Sheet: Overview
Supplementary Data
Droplet-based microfluidic photobioreactor as a growth optimization tool for cyanobacteria and microalgae
Nadia Prasetija1,2, Steffen Schneider1, Ting Xie1 and Jialan Cao1†
1 Technische Universität Ilmenau, Institute for Chemistry and Biotechnology, Dept. Physical Chemis-try and Microreaction Technology, Weimarerstr. 32, D-98693 Ilmenau, Germany
2 Institue for Bioprocess and Analytical Measurement Technology e.V., Rosenhof 37308 Heilbad Heiligenstadt
Table S1	Temperature development of the light system at 120 µmol photon m-2 s-1 and 300 µmol photon m-2 s-1 up to 300 minutes.
Table S2	Multiparameter determination of the growth of Chlorella vulgaris in BG11 medium in dependency of different light condition.
Table S3	Multiparameter determination of the growth of UTEX2973 in BG11 medium in dependency of different light condition.
Table S4	1D Dose-response screening of UTEX2973 against NaCl

## Sheet: S1 Fig.4 µPBR temperatur
Fig.4	Temperature development of the light system at 120 µE/m2s (a) and 300 µE/m2s (b) up to 300 minutes
(a) 120 µE/m2s		n=6
time (min)	470 nm	std.dev 470 nm	660 nm	std. dev. 660 nm	470nm+660nm	std. dev. 470nm+660nm	WL 4000K	std. dev. 4000K
0	21.8	0	21.8	0	21.8	0	21.8	0
10	22	0.30551	21.9833	0.13437	22.1167	0.33871	22.1333	0.32489
20	22.95	0.29861	21.9833	0.26719	22.2167	0.24777	22.3667	0.36818
30	23.25	0.30957	22	0.24495	22.45	0.12583	22.2667	0.11055
40	23.4	0.23805	22.7167	0.52731	23.4333	0.93571	23.2833	1.05106
60	25.15	0.60759	24.75	0.52202	25.8	1.20968	25.6667	1.17284
80	26.0667	0.55578	25.8833	0.36248	26.5667	1.30213	26.6833	1.26678
100	26.3333	0.47842	26.4167	0.31314	27.2167	1.41706	27.3833	1.22395
120	26.4167	0.51126	26.6333	0.60736	27.1333	1.06875	27.2	1.06771
180	26.55	0.57082	26.6667	0.54058	27.8167	0.52731	27.85	0.54696
265	26.7167	0.49469	26.9333	0.37712	28.3333	0.26874	28.2	0.3
300	26.8	0.55678	27.5667	0.04714	28.55	0.39476	28.4	0.39158
(b) 300 µE/m2s
time (min)	470 nm	std.dev 470 nm	660 nm	std. dev. 660 nm	470nm+660nm	std. dev. 470nm+660nm	WL 4000K	std. dev. 4000K
0	21.8	0	21.8	0	21.8	0	21.8	0
10	23.0833	0.59838	23.3667	0.45338	24.7333	0.70632	24.35	0.6702
20	23.6667	0.22111	24.45	0.44628	25.85	0.40723	25.5167	0.51774
30	25.3667	1.08577	24.9667	0.94634	26.7167	0.33375	26.2167	0.60116
40	25.1833	0.82748	26.4667	0.90123	28.0833	1.04629	27.9167	1.27856
60	26.3667	0.67495	27.4667	0.49889	28.6333	0.335	28.35	0.44628
80	27.1833	0.8315	28.7667	0.94281	30.8	1.14891	30.25	1.50305
100	27.9667	0.62893	28.4333	0.98601	31.0667	1.29829	29.95	1.30224
120	28	0.61101	28.8667	0.81786	31.2	0.67082	30.6	1.51548
180	29.8167	1.21026	29.85	0.92691	31.95	1.40327	31.1833	1.25753
265	30.1167	1.22122	29.5	0.36968	32.2667	1.41146	31.2	0.83267
300	29.95	1.17863	29.1167	0.54594	32.0167	1.44039	31.05	0.93229

## Sheet: S2 Fig. 5 C. vulgaris growth
Fig.6	Multiparameter determination of the growth of Chlorella vulgaris
(a) non-specific autofluorescence with 16:8 light-dark cycle					(b) detection of chlorophyl a with 16:8 light-dark cycle					(c) optical density at 750 nm with 16:8 light-dark cycle
light (nm)	intensity (µE/m2s)	NFU (Ex.405nm/Em.425nm)	std. dev.		light (nm)	intensity (µE/m2s)	NFU (Ex.515nm/Em.650nm)	std. dev.		light (nm)	intensity (µE/m2s)	OD750nm	std. dev.
470	54	3.04413	0.35589		470	54	112.849	6.01521		470	54	0.00999	0.00171
	120	2.154	0.20208			120	53.5142	3.97821			120	0.0078	0.000858
	192	1.94553	0.23821			192	40.0094	3.49396			192	0.00853	0.00113
	270	2.2018	0.32078			270	42.6632	2.25563			270	0.00797	0.000863
660	54	6.96574	0.60259		660	54	181.578	9.40583		660	54	0.01269	0.00194
	120	5.37559	0.54951			120	130.56	9.79415			120	0.01027	0.00112
	192	3.92611	0.41677			192	104.525	6.08803			192	0.01127	0.00124
	270	3.96943	0.32919			270	93.3347	6.35734			270	0.01094	0.000867
470 + 660	54	5.25421	0.40036		470 + 660	54	131.734	12.0607		470 + 660	54	0.0105	0.00101
	120	3.25902	0.37551			120	96.4114	7.49527			120	0.00932	0.00108
	192	2.05869	0.29763			192	54.0794	5.29858			192	0.01041	0.00101
	270	2.12298	0.22159			270	50.2159	5.73391			270	0.00788	0.000855
WL	54	6.5467	0.42868		WL	54	202.14	9.96416		WL	54	0.01264	0.000602
	120	5.02765	0.30855			120	156.28	7.85907			120	0.01068	0.000831
	192	5.65433	0.3737			192	126.615	9.70812			192	0.01225	0.00136
	270	3.43948	0.45543			270	98.9509	8.59634			270	0.01139	0.00113
(d) non-specific autofluorescence with continous illumination					(e) detection of chlorophyl a with continous illumination					(f) optical density at 750 nm with continous illumination
light (nm)	intensity (µE/m2s)	NFU (Ex.405nm/Em.425nm)	std. dev.		light (nm)	intensity (µE/m2s)	NFU (Ex.515nm/Em.650nm)	std. dev.		light (nm)	intensity (µE/m2s)	OD750nm	std. dev.
470	54	4.22756	0.37464		470	54	90.7774	14.0953		470	54	0.00996	0.0026
	120	2.09664	0.14466			120	82.4358	12.8464			120	0.00972	0.00205
	192	3.68288	0.98272			192	147.246	45.4492			192	0.01237	0.00522
	270	1.24541	0.09867			270	29.0561	2.47459			270	0.00764	0.000931
660	54	5.1497	0.70826		660	54	159.844	3.4301		660	54	0.01323	0.00323
	120	3.58435	0.41533			120	72.7086	11.2488			120	0.00816	0.00212
	192	1.87802	0.23077			192	56.3742	14.9377			192	0.00789	0.000946
	270	1.67085	0.14572			270	54.1372	11.4555			270	0.00628	0.000977
470 + 660	54	2.34589	0.39033		470 + 660	54	82.2636	9.93876		470 + 660	54	0.00438	0.00124
	120	1.65321	0.11754			120	42.0181	1.97249			120	0.003	0.00055
	192	1.53122	0.12502			192	41.8376	3.751			192	0.01237	0.00522
	270	1.15029	0.1055			270	34.7032	5.44459			270	0.00434	0.001
WL	54	4.83275	0.38845		WL	54	150.566	6.98492		WL	54	0.00788	0.0012
	120	3.45767	0.68922			120	85.2045	12.7872			120	0.00486	0.00103
	192	2.63786	0.25119			192	72.8196	10.5239			192	0.0097	0.00229
	270	3.2704	0.65336			270	87.8908	20.9108			270	0.00542	0.000949

## Sheet: S3 Fig. 7 UTEX2973 growth
Fig.6	Multiparameter determination of the growth of UTEX2973
(a) non-specific autofluorescence with 16:8 light-dark cycle					(b) detection of chlorophyl a with 16:8 light-dark cycle					(c) optical density at 750 nm with 16:8 light-dark cycle
light (nm)	intensity (µE/m2s)	NFU (Ex.405nm/Em.425nm)	std. dev.		light (nm)	intensity (µE/m2s)	NFU (Ex.515nm/Em.650nm)	std. dev.		light (nm)	intensity (µE/m2s)	OD750nm	std. dev.
470	54	0.92059	0.0889		470	54	6.72819	0.4032		470	54	0.00639	0.000513
	120	0.55597	0.0739			120	2.07292	0.38088			120	0.00663	0.000545
	192	0.53227	0.10808			192	2.25326	0.71701			192	0.0043	0.000253
	270	0.3736	0.04035			270	0.67107	0.19408			270	0.00508	0.000442
660	54	0.94541	0.10488		660	54	2.45704	0.54799		660	54	0.00549	0.000341
	120	0.77165	0.0662			120	1.92247	0.49311			120	0.00529	0.000271
	192	0.47125	0.02129			192	0.79036	0.06165			192	0.00509	0.000478
	270	0.4495	0.01741			270	0.7997	0.18144			270	0.00538	0.00031
470 + 660	54	0.36915	0.05057		470 + 660	54	2.4271	0.31428		470 + 660	54	0.00982	0.00127
	120	0.50097	0.04663			120	1.18383	0.18275			120	0.00671	0.000906
	192	0.36138	0.01319			192	0.44069	0.06921			192	0.00714	0.000422
	270	0.34455	0.01504			270	0.66117	0.10643			270	0.00486	0.00046
WL	54	0.48347	0.02642		WL	54	2.26055	0.18318		WL	54	0.0084	0.00116
	120	0.42175	0.01684			120	0.79172	0.075			120	0.00813	0.000775
	192	0.38903	0.02073			192	0.57683	0.08585			192	0.00607	0.00081
	270	0.34534	0.01461			270	0.40738	0.04712			270	0.00648	0.000536
(d) non-specific autofluorescence with continous illumination					(e) detection of chlorophyl a with continous illumination					(f) optical density at 750 nm with continous illumination
light (nm)	intensity (µE/m2s)	NFU (Ex.405nm/Em.425nm)	std. dev.		light (nm)	intensity (µE/m2s)	NFU (Ex.515nm/Em.650nm)	std. dev.		light (nm)	intensity (µE/m2s)	OD750nm	std. dev.
470	54	2.46952	0.10326		470	54	15.53	0.66058		470	54	0.00996	0.00119
	120	1.83005	0.04583			120	8.28286	0.22473			120	0.0157	0.00112
	192	1.39327	0.03636			192	3.95401	0.07036			192	0.01313	0.0013
	270	1.27026	0.0294			270	3.15648	0.11913			270	0.01187	0.000842
660	54	1.51785	0.04719		660	54	5.76563	0.44104		660	54	0.01426	0.000866
	120	1.38874	0.02787			120	3.95329	0.19364			120	0.01264	0.000431
	192	1.40458	0.01657			192	3.79532	0.13028			192	0.01144	0.000625
	270	1.4622	0.04075			270	3.18327	0.15053			270	0.00997	0.000387
470 + 660	54	1.31753	0.05754		470 + 660	54	5.33486	0.4019		470 + 660	54	0.02077	0.00177
	120	1.11721	0.02868			120	3.77483	0.17815			120	0.01603	0.000803
	192	1.25385	0.06252			192	2.70667	0.14179			192	0.01276	0.000708
	270	1.14383	0.07631			270	1.61267	0.08165			270	0.01214	0.000759
WL	54	1.32996	0.04436		WL	54	5.48306	0.33776		WL	54	0.02185	0.00287
	120	1.15488	0.04368			120	3.96456	0.08957			120	0.0154	0.000691
	192	1.09127	0.04904			192	3.10413	0.15938			192	0.01342	0.00059
	270	1.09055	0.05643			270	3.03634	0.05311			270	0.01284	0.000959

## Sheet: S4 Fig.8 UTEX2973 against NaCl
Fig.6	Dose-response curves of UTEX2973 against NaCl (0 - 0.6 M)
470 nm						660 nm						470 nm + 660 nm						WL 4000K
NaCl (M)	NFU (Ex.405nm/Em.425nm)	std. dev	NaCl (M)	FIT B470		NaCl (M)	NFU (Ex.405nm/Em.425nm)	std. dev	NaCl (M)	FIT R660		NaCl (M)	NFU (Ex.405nm/Em.425nm)	std. dev	NaCl (M)	FIT B470+R660		NaCl (M)	NFU (Ex.405nm/Em.425nm)	std. dev	NaCl (M)	FIT 4000K
0.04465	0.67177	0.0405	0	0.69455		0.01554	0.61515	0.03649	0	0.65401		0	0.63505	0.02651	0	0.59025		0	0.53191	0.0315	0	0.5741
0.05943	0.70224	0.04112	0.0006	0.69455		0.02036	0.61666	0.03631	0.0006	0.65401		0.00346	0.63054	0.01827	0.0006	0.59025		0.00584	0.5448	0.03235	0.0006	0.5741
0.07152	0.72048	0.04095	0.0012	0.69455		0.02771	0.57734	0.03472	0.0012	0.65401		0.02669	0.54424	0.03246	0.0012	0.59025		0.01237	0.52178	0.03175	0.0012	0.5741
0.07985	0.71318	0.03937	0.0018	0.69455		0.03493	0.6233	0.03539	0.0018	0.65401		0.03253	0.6067	0.03589	0.0018	0.59025		0.0185	0.54903	0.0324	0.0018	0.5741
0.09221	0.70118	0.04216	0.0024	0.69455		0.04862	0.57642	0.03451	0.0024	0.65401		0.04101	0.57387	0.03375	0.0024	0.59025		0.02516	0.52667	0.03168	0.0024	0.5741
0.1008	0.72781	0.04067	0.003	0.69455		0.05356	0.55666	0.03362	0.003	0.65401		0.05035	0.53351	0.0221	0.003	0.59025		0.03488	0.56906	0.03382	0.003	0.5741
0.11142	0.7474	0.01827	0.0036	0.69455		0.06167	0.61456	0.02573	0.0036	0.65401		0.06525	0.54781	0.03424	0.0036	0.59025		0.05913	0.61798	0.02863	0.0036	0.5741
0.15292	0.59241	0.01151	0.0042	0.69455		0.07232	0.57815	0.03347	0.0042	0.65401		0.07168	0.55059	0.03261	0.0042	0.59025		0.07179	0.63712	0.03969	0.0042	0.5741
0.17656	0.43291	0.01151	0.0048	0.69455		0.0784	0.61653	0.0362	0.0048	0.65401		0.07899	0.55514	0.03246	0.0048	0.59025		0.07765	0.52988	0.03151	0.0048	0.5741
0.18852	0.11935	0.0028	0.0054	0.69455		0.08385	0.60337	0.03507	0.0054	0.65401		0.08819	0.55142	0.03236	0.0054	0.59025		0.08644	0.49763	0.0295	0.0054	0.5741
0.19644	0.08857	0.00327	0.006	0.69455		0.09006	0.54452	0.03148	0.006	0.65401		0.09476	0.54351	0.02167	0.006	0.59025		0.0959	0.50828	0.0307	0.006	0.5741
0.20209	0.09029	0.00383	0.0066	0.69455		0.09691	0.65632	0.03959	0.0066	0.65401		0.10499	0.51605	0.03003	0.0066	0.59025		0.10096	0.535	0.03189	0.0066	0.5741
0.20813	0.08436	0.00251	0.0072	0.69455		0.10388	0.63123	0.03816	0.0072	0.65401		0.11419	0.55709	0.03337	0.0072	0.59025		0.11308	0.56423	0.01791	0.0072	0.5741
0.21458	0.08479	0.00292	0.0078	0.69455		0.10907	0.61317	0.03673	0.0078	0.65401		0.12354	0.5577	0.03272	0.0078	0.59025		0.13014	0.56412	0.02479	0.0078	0.5741
0.22035	0.0808	0.00314	0.0084	0.69455		0.11617	0.57524	0.02435	0.0084	0.65401		0.13113	0.56383	0.03304	0.0084	0.59025		0.13853	0.53045	0.02185	0.0084	0.5741
0.2264	0.07456	0.00263	0.009	0.69455		0.13049	0.78277	0.02158	0.009	0.65401		0.13829	0.67088	0.03962	0.009	0.59025		0.15198	0.54777	0.02246	0.009	0.5741
0.23244	0.07508	0.00315	0.0096	0.69455		0.15381	0.83612	0.05039	0.0096	0.65401		0.16692	0.40713	0.02206	0.0096	0.59025		0.16118	0.53249	0.03167	0.0096	0.5741
0.23956	0.07292	0.00205	0.0102	0.69455		0.16281	0.63128	0.03388	0.0102	0.65401		0.17408	0.50015	0.01795	0.0102	0.59025		0.17343	0.5766	0.02399	0.0102	0.5741
0.24614	0.06981	0.00223	0.0108	0.69455		0.18068	0.63418	0.03732	0.0108	0.65401		0.18796	0.47582	0.02789	0.0108	0.59025		0.18595	0.57844	0.03544	0.0108	0.5741
0.25246	0.0756	0.00241	0.0114	0.69455		0.18537	0.6806	0.03186	0.0114	0.65401		0.19351	0.48351	0.02719	0.0114	0.59025		0.19235	0.54113	0.03219	0.0114	0.5741
0.25917	0.07502	0.00283	0.012	0.69455		0.19931	0.66499	0.03035	0.012	0.65401		0.20081	0.49669	0.01961	0.012	0.59025		0.20527	0.52353	0.03121	0.012	0.5741
0.26602	0.06779	0.00187	0.0126	0.69455		0.21034	0.65541	0.03093	0.0126	0.65401		0.21206	0.30689	0.01719	0.0126	0.59025		0.21233	0.62961	0.01598	0.0126	0.5741
0.27207	0.06664	0.00214	0.0132	0.69455		0.21921	0.63343	0.03839	0.0132	0.65401		0.21907	0.25679	0.01376	0.0132	0.59025		0.24737	0.59813	0.0345	0.0132	0.5741
0.27865	0.06787	0.00183	0.0138	0.69455		0.22516	0.62612	0.03775	0.0138	0.65401		0.23207	0.1741	0.00882	0.0138	0.59025		0.25816	0.56224	0.01424	0.0138	0.5741
0.28456	0.07013	0.00232	0.0144	0.69455		0.23049	0.61695	0.02396	0.0144	0.65401		0.24186	0.1631	0.00889	0.0144	0.59025		0.27628	0.49355	0.0295	0.0144	0.5741
0.29101	0.09473	0.00363	0.015	0.69455		0.24189	0.62028	0.03721	0.015	0.65401		0.24931	0.15406	0.00523	0.015	0.59025		0.28227	0.48471	0.02862	0.015	0.5741
0.29773	0.14299	0.00682	0.0156	0.69455		0.24709	0.62679	0.03707	0.0156	0.65401		0.26465	0.14902	0.00692	0.0156	0.59025		0.28867	0.46649	0.02696	0.0156	0.5741
0.31183	0.15617	0.00731	0.0162	0.69455		0.25254	0.6245	0.03736	0.0162	0.65401		0.27254	0.13909	0.00662	0.0162	0.59025		0.30279	0.49125	0.02014	0.0162	0.5741
0.33614	0.16333	0.00404	0.0168	0.69455		0.25837	0.60814	0.03559	0.0168	0.65401		0.28072	0.1219	0.00566	0.0168	0.59025		0.31225	0.36117	0.01996	0.0168	0.5741
0.35199	0.06051	0.00185	0.0174	0.69455		0.26737	0.61504	0.02571	0.0174	0.65401		0.28715	0.11049	0.00479	0.0174	0.59025		0.32171	0.24058	0.01254	0.0174	0.5741
0.35871	0.05255	0.00123	0.018	0.69455		0.28524	0.68888	0.02922	0.018	0.65401		0.29737	0.08965	0.00391	0.018	0.59025		0.32823	0.22857	0.01238	0.018	0.5741
0.36569	0.05312	0.000913	0.0186	0.69455		0.29474	0.646	0.02085	0.0186	0.65401		0.30511	0.09017	0.00338	0.0186	0.59025		0.33596	0.21881	0.00526	0.0186	0.5741
0.37241	0.05167	0.00105	0.0192	0.69455		0.31147	0.70981	0.02305	0.0192	0.65401		0.31183	0.10063	0.00367	0.0192	0.59025		0.35381	0.10767	0.00439	0.0192	0.5741
0.37926	0.0496	0.000799	0.0198	0.69455		0.33314	0.49659	0.02885	0.0198	0.65401		0.32016	0.08702	0.00291	0.0198	0.59025		0.36061	0.1094	0.00453	0.0198	0.5741
0.38611	0.05142	0.0011	0.0204	0.69455		0.33808	0.61112	0.01564	0.0204	0.65401		0.32702	0.08891	0.00322	0.0204	0.59025		0.36953	0.13305	0.0058	0.0204	0.5741
0.39323	0.05446	0.00156	0.021	0.69455		0.35127	0.35081	0.02036	0.021	0.65401		0.33564	0.09657	0.00398	0.021	0.59025		0.37753	0.23509	0.00663	0.021	0.5741
0.40022	0.0467	0.000861	0.0216	0.69455		0.35938	0.29868	0.01696	0.0216	0.65401		0.34295	0.11622	0.00537	0.0216	0.59025		0.38659	0.19253	0.01023	0.0216	0.5741
0.4072	0.04888	0.000701	0.0222	0.69455		0.36419	0.26959	0.01516	0.0222	0.65401		0.35113	0.16029	0.00826	0.0222	0.59025		0.39418	0.17332	0.00838	0.0222	0.5741
0.41378	0.05298	0.00129	0.0228	0.69455		0.37218	0.25055	0.01417	0.0228	0.65401		0.35843	0.1818	0.00944	0.0228	0.59025		0.40111	0.06416	0.0017	0.0228	0.5741
0.4205	0.0508	0.00105	0.0234	0.69455		0.37953	0.23215	0.01251	0.0234	0.65401		0.36398	0.17985	0.00586	0.0234	0.59025		0.40684	0.07841	0.00239	0.0234	0.5741
0.42708	0.05462	0.00129	0.024	0.69455		0.38929	0.21762	0.01137	0.024	0.65401		0.37932	0.08568	0.00294	0.024	0.59025		0.4135	0.07691	0.00267	0.024	0.5741
0.4338	0.04968	0.00154	0.0246	0.69455		0.40259	0.17452	0.00907	0.0246	0.65401		0.38735	0.06896	0.00214	0.0246	0.59025		0.42016	0.06628	0.00187	0.0246	0.5741
0.44065	0.05179	0.000773	0.0252	0.69455		0.41146	0.16472	0.00795	0.0252	0.65401		0.39583	0.06279	0.00156	0.0252	0.59025		0.42669	0.05757	0.00137	0.0252	0.5741
0.44683	0.05231	0.00108	0.0258	0.69455		0.4192	0.15552	0.00782	0.0258	0.65401		0.40372	0.05714	0.00138	0.0258	0.59025		0.43388	0.0584	0.00136	0.0258	0.5741
0.45341	0.05435	0.00129	0.0264	0.69455		0.42642	0.1529	0.00756	0.0264	0.65401		0.41102	0.05649	0.00134	0.0264	0.59025		0.44054	0.05786	0.00147	0.0264	0.5741
0.45999	0.05595	0.00138	0.027	0.69455		0.43554	0.13133	0.00627	0.027	0.65401		0.41832	0.0542	0.00119	0.027	0.59025		0.44734	0.05574	0.00104	0.027	0.5741
0.46644	0.0714	0.00247	0.0276	0.69455		0.4434	0.12356	0.00546	0.0276	0.65401		0.42621	0.05401	0.00108	0.0276	0.59025		0.45413	0.06328	0.00154	0.0276	0.5741
0.47409	0.10219	0.00422	0.0282	0.69455		0.44999	0.12386	0.00532	0.0282	0.65401		0.43366	0.05327	0.000933	0.0282	0.59025		0.46093	0.05947	0.00146	0.0282	0.5741
0.48833	0.11843	0.00566	0.0288	0.69455		0.4562	0.11703	0.00488	0.0288	0.65401		0.4414	0.05314	0.000975	0.0288	0.59025		0.46759	0.05717	0.00136	0.0288	0.5741
0.50324	0.10472	0.00275	0.0294	0.69455		0.46178	0.12048	0.00558	0.0294	0.65401		0.44856	0.04844	0.000941	0.0294	0.59025		0.47438	0.05886	0.00133	0.0294	0.5741
0.51399	0.05346	0.000947	0.03	0.69455		0.46634	0.14403	0.00628	0.03	0.65401		0.4563	0.04778	0.000804	0.03	0.59025		0.48118	0.06045	0.00145	0.03	0.5741
0.52097	0.05047	0.000748	0.0306	0.69455		0.47737	0.13912	0.00667	0.0306	0.65401		0.46405	0.04934	0.000994	0.0306	0.59025		0.48784	0.05415	0.000923	0.0306	0.5741
0.52796	0.05518	0.00258	0.0312	0.69455		0.4837	0.18515	0.00938	0.0312	0.65401		0.4715	0.05369	0.00129	0.0312	0.59025		0.49437	0.05211	0.00111	0.0312	0.5741
0.53414	0.04773	0.000844	0.0318	0.69455		0.49055	0.15181	0.00709	0.0318	0.65401		0.47734	0.06537	0.000866	0.0318	0.59025		0.5013	0.05414	0.00111	0.0318	0.5741
0.54099	0.0469	0.000629	0.0324	0.69455		0.496	0.12625	0.00576	0.0324	0.65401		0.5159	0.0517	0.00113	0.0324	0.59025		0.50796	0.05288	0.00108	0.0324	0.5741
0.54824	0.05276	0.00151	0.033	0.69455		0.50208	0.0986	0.00441	0.033	0.65401		0.52423	0.05564	0.0018	0.033	0.59025		0.51449	0.05335	0.00105	0.033	0.5741
0.55536	0.04743	0.0012	0.0336	0.69455		0.50867	0.09184	0.00339	0.0336	0.65401		0.53153	0.0528	0.00105	0.0336	0.59025		0.52141	0.05153	0.000677	0.0336	0.5741
0.56181	0.0451	0.00191	0.0342	0.69455		0.51501	0.09426	0.00374	0.0342	0.65401		0.53898	0.06297	0.0013	0.0342	0.59025		0.52821	0.05228	0.00105	0.0342	0.5741
0.56839	0.04961	0.00162	0.0348	0.69455		0.52198	0.08908	0.00328	0.0348	0.65401		0.5457	0.10608	0.00437	0.0348	0.59025		0.53474	0.04967	0.000851	0.0348	0.5741
0.57497	0.0457	0.000822	0.0354	0.69455		0.52819	0.0813	0.00291	0.0354	0.65401		0.55257	0.10709	0.00487	0.0354	0.59025		0.54126	0.06489	0.00215	0.0354	0.5741
0.58169	0.04624	0.000501	0.036	0.69455		0.53453	0.08572	0.00325	0.036	0.65401		0.56075	0.07932	0.00243	0.036	0.59025		0.54793	0.10995	0.0049	0.036	0.5741
0.58934	0.04123	0.00106	0.0366	0.69455		0.54124	0.07854	0.00292	0.0366	0.65401		0.56849	0.05838	0.00151	0.0366	0.59025		0.55472	0.1479	0.00716	0.0366	0.5741
0.59566	0.04613	0.000698	0.0372	0.69455		0.54771	0.08552	0.00315	0.0372	0.65401		0.57594	0.05766	0.00132	0.0372	0.59025		0.56072	0.0827	0.00285	0.0372	0.5741
0.6	0.04828	0.000617	0.0378	0.69455		0.55392	0.08153	0.00265	0.0378	0.65401		0.58368	0.05122	0.000865	0.0378	0.59025		0.56844	0.05483	0.00126	0.0378	0.5741
			0.0384	0.69455		0.56013	0.08566	0.0032	0.0384	0.65401		0.59084	0.05363	0.00145	0.0384	0.59025		0.57471	0.04854	0.00117	0.0384	0.5741
			0.039	0.69455		0.56646	0.08343	0.00306	0.039	0.65401		0.59888	0.05028	0.000991	0.039	0.59025		0.58123	0.05284	0.00132	0.039	0.5741
			0.0396	0.69455		0.5728	0.07957	0.00306	0.0396	0.65401		0.6	0.05209	0.00124	0.0396	0.59025		0.58883	0.05179	0.00105	0.0396	0.5741
			0.0402	0.69455		0.57939	0.07069	0.00242	0.0402	0.65401					0.0402	0.59025		0.59536	0.04797	0.000836	0.0402	0.5741
			0.0408	0.69455		0.58598	0.07246	0.00205	0.0408	0.65401					0.0408	0.59025		0.6	0.05381	0.00152	0.0408	0.5741
			0.0414	0.69455		0.59219	0.07977	0.00263	0.0414	0.65401					0.0414	0.59025					0.0414	0.5741
			0.042	0.69455		0.59827	0.07806	0.00262	0.042	0.65401					0.042	0.59024					0.042	0.5741
			0.0426	0.69455		0.6	0.06831	0.00193	0.0426	0.65401					0.0426	0.59024					0.0426	0.5741
			0.0432	0.69455					0.0432	0.65401					0.0432	0.59024					0.0432	0.5741
			0.0438	0.69454					0.0438	0.65401					0.0438	0.59024					0.0438	0.5741
			0.0444	0.69454					0.0444	0.65401					0.0444	0.59024					0.0444	0.5741
			0.045	0.69454					0.045	0.65401					0.045	0.59024					0.045	0.5741
			0.0456	0.69454					0.0456	0.65401					0.0456	0.59024					0.0456	0.5741
			0.0462	0.69454					0.0462	0.65401					0.0462	0.59024					0.0462	0.5741
			0.0468	0.69454					0.0468	0.65401					0.0468	0.59024					0.0468	0.5741
			0.0474	0.69453					0.0474	0.65401					0.0474	0.59024					0.0474	0.5741
			0.048	0.69453					0.048	0.65401					0.048	0.59024					0.048	0.5741
			0.0486	0.69453					0.0486	0.65401					0.0486	0.59024					0.0486	0.5741
			0.0492	0.69452					0.0492	0.65401					0.0492	0.59024					0.0492	0.5741
			0.0498	0.69452					0.0498	0.65401					0.0498	0.59024					0.0498	0.5741
			0.0504	0.69452					0.0504	0.65401					0.0504	0.59024					0.0504	0.5741
			0.051	0.69451					0.051	0.65401					0.051	0.59024					0.051	0.5741
			0.0516	0.69451					0.0516	0.65401					0.0516	0.59023					0.0516	0.5741
			0.0522	0.6945					0.0522	0.65401					0.0522	0.59023					0.0522	0.5741
			0.0528	0.69449					0.0528	0.65401					0.0528	0.59023					0.0528	0.5741
			0.0534	0.69449					0.0534	0.65401					0.0534	0.59023					0.0534	0.5741
			0.054	0.69448					0.054	0.65401					0.054	0.59023					0.054	0.5741
			0.0546	0.69447					0.0546	0.65401					0.0546	0.59023					0.0546	0.5741
			0.0552	0.69446					0.0552	0.65401					0.0552	0.59023					0.0552	0.5741
			0.0558	0.69445					0.0558	0.65401					0.0558	0.59022					0.0558	0.5741
			0.0564	0.69444					0.0564	0.65401					0.0564	0.59022					0.0564	0.5741
			0.057	0.69442					0.057	0.65401					0.057	0.59022					0.057	0.5741
			0.0576	0.69441					0.0576	0.65401					0.0576	0.59022					0.0576	0.5741
			0.0582	0.69439					0.0582	0.65401					0.0582	0.59021					0.0582	0.5741
			0.0588	0.69437					0.0588	0.65401					0.0588	0.59021					0.0588	0.5741
			0.0594	0.69435					0.0594	0.65401					0.0594	0.59021					0.0594	0.5741
			0.06	0.69433					0.06	0.65401					0.06	0.59021					0.06	0.5741
			0.0606	0.69431					0.0606	0.65401					0.0606	0.5902					0.0606	0.5741
			0.0612	0.69428					0.0612	0.65401					0.0612	0.5902					0.0612	0.5741
			0.0618	0.69426					0.0618	0.65401					0.0618	0.5902					0.0618	0.5741
			0.0624	0.69423					0.0624	0.65401					0.0624	0.59019					0.0624	0.5741
			0.063	0.69419					0.063	0.65401					0.063	0.59019					0.063	0.5741
			0.0636	0.69416					0.0636	0.65401					0.0636	0.59018					0.0636	0.5741
			0.0642	0.69412					0.0642	0.65401					0.0642	0.59018					0.0642	0.5741
			0.0648	0.69408					0.0648	0.65401					0.0648	0.59017					0.0648	0.5741
			0.0654	0.69403					0.0654	0.65401					0.0654	0.59017					0.0654	0.5741
			0.066	0.69398					0.066	0.65401					0.066	0.59016					0.066	0.5741
			0.0666	0.69393					0.0666	0.65401					0.0666	0.59016					0.0666	0.5741
			0.0672	0.69387					0.0672	0.65401					0.0672	0.59015					0.0672	0.5741
			0.0678	0.6938					0.0678	0.65401					0.0678	0.59014					0.0678	0.5741
			0.0684	0.69374					0.0684	0.65401					0.0684	0.59014					0.0684	0.5741
			0.069	0.69366					0.069	0.65401					0.069	0.59013					0.069	0.5741
			0.0696	0.69358					0.0696	0.65401					0.0696	0.59012					0.0696	0.5741
			0.0702	0.69349					0.0702	0.65401					0.0702	0.59011					0.0702	0.5741
			0.0708	0.6934					0.0708	0.65401					0.0708	0.5901					0.0708	0.5741
			0.0714	0.6933					0.0714	0.65401					0.0714	0.59009					0.0714	0.5741
			0.072	0.69319					0.072	0.65401					0.072	0.59008					0.072	0.5741
			0.0726	0.69307					0.0726	0.65401					0.0726	0.59007					0.0726	0.5741
			0.0732	0.69294					0.0732	0.65401					0.0732	0.59006					0.0732	0.5741
			0.0738	0.69281					0.0738	0.65401					0.0738	0.59005					0.0738	0.5741
			0.0744	0.69266					0.0744	0.65401					0.0744	0.59004					0.0744	0.5741
			0.075	0.6925					0.075	0.65401					0.075	0.59003					0.075	0.5741
			0.0756	0.69233					0.0756	0.65401					0.0756	0.59001					0.0756	0.5741
			0.0762	0.69215					0.0762	0.65401					0.0762	0.59					0.0762	0.5741
			0.0768	0.69195					0.0768	0.65401					0.0768	0.58998					0.0768	0.5741
			0.0774	0.69174					0.0774	0.65401					0.0774	0.58997					0.0774	0.5741
			0.078	0.69152					0.078	0.65401					0.078	0.58995					0.078	0.5741
			0.0786	0.69128					0.0786	0.65401					0.0786	0.58993					0.0786	0.5741
			0.0792	0.69102					0.0792	0.65401					0.0792	0.58991					0.0792	0.5741
			0.0798	0.69075					0.0798	0.65401					0.0798	0.58989					0.0798	0.5741
			0.0804	0.69045					0.0804	0.65401					0.0804	0.58987					0.0804	0.5741
			0.081	0.69014					0.081	0.65401					0.081	0.58985					0.081	0.5741
			0.0816	0.6898					0.0816	0.65401					0.0816	0.58983					0.0816	0.5741
			0.0822	0.68944					0.0822	0.65401					0.0822	0.58981					0.0822	0.5741
			0.0828	0.68906					0.0828	0.65401					0.0828	0.58978					0.0828	0.5741
			0.0834	0.68865					0.0834	0.65401					0.0834	0.58976					0.0834	0.5741
			0.084	0.68822					0.084	0.65401					0.084	0.58973					0.084	0.5741
			0.0846	0.68776					0.0846	0.65401					0.0846	0.5897					0.0846	0.5741
			0.0852	0.68726					0.0852	0.65401					0.0852	0.58967					0.0852	0.5741
			0.0858	0.68674					0.0858	0.65401					0.0858	0.58964					0.0858	0.5741
			0.0864	0.68618					0.0864	0.65401					0.0864	0.58961					0.0864	0.5741
			0.087	0.68559					0.087	0.65401					0.087	0.58958					0.087	0.5741
			0.0876	0.68496					0.0876	0.65401					0.0876	0.58954					0.0876	0.5741
			0.0882	0.6843					0.0882	0.65401					0.0882	0.5895					0.0882	0.5741
			0.0888	0.68359					0.0888	0.65401					0.0888	0.58946					0.0888	0.5741
			0.0894	0.68284					0.0894	0.65401					0.0894	0.58942					0.0894	0.5741
			0.09	0.68204					0.09	0.65401					0.09	0.58938					0.09	0.5741
			0.0906	0.6812					0.0906	0.65401					0.0906	0.58934					0.0906	0.5741
			0.0912	0.68031					0.0912	0.65401					0.0912	0.58929					0.0912	0.5741
			0.0918	0.67937					0.0918	0.654					0.0918	0.58924					0.0918	0.5741
			0.0924	0.67837					0.0924	0.654					0.0924	0.5892					0.0924	0.5741
			0.093	0.67732					0.093	0.654					0.093	0.58914					0.093	0.5741
			0.0936	0.67621					0.0936	0.654					0.0936	0.58909					0.0936	0.5741
			0.0942	0.67503					0.0942	0.654					0.0942	0.58903					0.0942	0.5741
			0.0948	0.67379					0.0948	0.654					0.0948	0.58897					0.0948	0.5741
			0.0954	0.67249					0.0954	0.654					0.0954	0.58891					0.0954	0.5741
			0.096	0.67111					0.096	0.654					0.096	0.58885					0.096	0.5741
			0.0966	0.66966					0.0966	0.654					0.0966	0.58878					0.0966	0.5741
			0.0972	0.66814					0.0972	0.654					0.0972	0.58871					0.0972	0.5741
			0.0978	0.66653					0.0978	0.654					0.0978	0.58864					0.0978	0.5741
			0.0984	0.66485					0.0984	0.654					0.0984	0.58857					0.0984	0.5741
			0.099	0.66307					0.099	0.654					0.099	0.58849					0.099	0.5741
			0.0996	0.66121					0.0996	0.654					0.0996	0.58841					0.0996	0.5741
			0.1002	0.65926					0.1002	0.654					0.1002	0.58832					0.1002	0.5741
			0.1008	0.65722					0.1008	0.654					0.1008	0.58824					0.1008	0.5741
			0.1014	0.65507					0.1014	0.654					0.1014	0.58815					0.1014	0.5741
			0.102	0.65283					0.102	0.654					0.102	0.58805					0.102	0.5741
			0.1026	0.65048					0.1026	0.654					0.1026	0.58795					0.1026	0.5741
			0.1032	0.64802					0.1032	0.654					0.1032	0.58785					0.1032	0.5741
			0.1038	0.64545					0.1038	0.654					0.1038	0.58775					0.1038	0.5741
			0.1044	0.64277					0.1044	0.654					0.1044	0.58764					0.1044	0.5741
			0.105	0.63998					0.105	0.654					0.105	0.58752					0.105	0.5741
			0.1056	0.63706					0.1056	0.654					0.1056	0.58741					0.1056	0.5741
			0.1062	0.63402					0.1062	0.654					0.1062	0.58728					0.1062	0.5741
			0.1068	0.63086					0.1068	0.654					0.1068	0.58716					0.1068	0.5741
			0.1074	0.62757					0.1074	0.654					0.1074	0.58703					0.1074	0.5741
			0.108	0.62415					0.108	0.654					0.108	0.58689					0.108	0.5741
			0.1086	0.62059					0.1086	0.654					0.1086	0.58675					0.1086	0.5741
			0.1092	0.6169					0.1092	0.654					0.1092	0.5866					0.1092	0.5741
			0.1098	0.61308					0.1098	0.654					0.1098	0.58645					0.1098	0.5741
			0.1104	0.60912					0.1104	0.654					0.1104	0.5863					0.1104	0.5741
			0.111	0.60502					0.111	0.654					0.111	0.58613					0.111	0.5741
			0.1116	0.60077					0.1116	0.654					0.1116	0.58597					0.1116	0.5741
			0.1122	0.59639					0.1122	0.654					0.1122	0.58579					0.1122	0.5741
			0.1128	0.59187					0.1128	0.654					0.1128	0.58561					0.1128	0.5741
			0.1134	0.5872					0.1134	0.654					0.1134	0.58543					0.1134	0.5741
			0.114	0.58239					0.114	0.654					0.114	0.58524					0.114	0.5741
			0.1146	0.57743					0.1146	0.654					0.1146	0.58504					0.1146	0.5741
			0.1152	0.57234					0.1152	0.654					0.1152	0.58483					0.1152	0.5741
			0.1158	0.5671					0.1158	0.654					0.1158	0.58462					0.1158	0.5741
			0.1164	0.56172					0.1164	0.654					0.1164	0.5844					0.1164	0.5741
			0.117	0.55621					0.117	0.654					0.117	0.58418					0.117	0.5741
			0.1176	0.55056					0.1176	0.654					0.1176	0.58394					0.1176	0.5741
			0.1182	0.54478					0.1182	0.654					0.1182	0.5837					0.1182	0.5741
			0.1188	0.53887					0.1188	0.65399					0.1188	0.58345					0.1188	0.5741
			0.1194	0.53283					0.1194	0.65399					0.1194	0.5832					0.1194	0.5741
			0.12	0.52667					0.12	0.65399					0.12	0.58293					0.12	0.5741
			0.1206	0.52039					0.1206	0.65399					0.1206	0.58266					0.1206	0.5741
			0.1212	0.514					0.1212	0.65399					0.1212	0.58237					0.1212	0.5741
			0.1218	0.50749					0.1218	0.65399					0.1218	0.58208					0.1218	0.5741
			0.1224	0.50088					0.1224	0.65399					0.1224	0.58178					0.1224	0.5741
			0.123	0.49418					0.123	0.65399					0.123	0.58147					0.123	0.5741
			0.1236	0.48738					0.1236	0.65399					0.1236	0.58115					0.1236	0.5741
			0.1242	0.48049					0.1242	0.65399					0.1242	0.58083					0.1242	0.5741
			0.1248	0.47352					0.1248	0.65399					0.1248	0.58049					0.1248	0.5741
			0.1254	0.46648					0.1254	0.65399					0.1254	0.58014					0.1254	0.5741
			0.126	0.45937					0.126	0.65399					0.126	0.57978					0.126	0.5741
			0.1266	0.45221					0.1266	0.65398					0.1266	0.57941					0.1266	0.5741
			0.1272	0.44499					0.1272	0.65398					0.1272	0.57903					0.1272	0.5741
			0.1278	0.43773					0.1278	0.65398					0.1278	0.57864					0.1278	0.5741
			0.1284	0.43043					0.1284	0.65398					0.1284	0.57823					0.1284	0.5741
			0.129	0.4231					0.129	0.65398					0.129	0.57782					0.129	0.5741
			0.1296	0.41575					0.1296	0.65398					0.1296	0.57739					0.1296	0.5741
			0.1302	0.40838					0.1302	0.65398					0.1302	0.57695					0.1302	0.57409
			0.1308	0.40101					0.1308	0.65398					0.1308	0.5765					0.1308	0.57409
			0.1314	0.39364					0.1314	0.65397					0.1314	0.57603					0.1314	0.57409
			0.132	0.38628					0.132	0.65397					0.132	0.57555					0.132	0.57409
			0.1326	0.37894					0.1326	0.65397					0.1326	0.57506					0.1326	0.57409
			0.1332	0.37162					0.1332	0.65397					0.1332	0.57456					0.1332	0.57409
			0.1338	0.36434					0.1338	0.65397					0.1338	0.57404					0.1338	0.57409
			0.1344	0.35709					0.1344	0.65397					0.1344	0.5735					0.1344	0.57409
			0.135	0.34989					0.135	0.65397					0.135	0.57296					0.135	0.57409
			0.1356	0.34274					0.1356	0.65396					0.1356	0.57239					0.1356	0.57409
			0.1362	0.33564					0.1362	0.65396					0.1362	0.57182					0.1362	0.57409
			0.1368	0.32861					0.1368	0.65396					0.1368	0.57122					0.1368	0.57409
			0.1374	0.32166					0.1374	0.65396					0.1374	0.57061					0.1374	0.57409
			0.138	0.31477					0.138	0.65396					0.138	0.56999					0.138	0.57409
			0.1386	0.30797					0.1386	0.65395					0.1386	0.56935					0.1386	0.57409
			0.1392	0.30126					0.1392	0.65395					0.1392	0.56869					0.1392	0.57409
			0.1398	0.29463					0.1398	0.65395					0.1398	0.56802					0.1398	0.57409
			0.1404	0.2881					0.1404	0.65395					0.1404	0.56733					0.1404	0.57409
			0.141	0.28166					0.141	0.65394					0.141	0.56662					0.141	0.57409
			0.1416	0.27533					0.1416	0.65394					0.1416	0.56589					0.1416	0.57409
			0.1422	0.2691					0.1422	0.65394					0.1422	0.56515					0.1422	0.57408
			0.1428	0.26298					0.1428	0.65393					0.1428	0.56439					0.1428	0.57408
			0.1434	0.25697					0.1434	0.65393					0.1434	0.56361					0.1434	0.57408
			0.144	0.25107					0.144	0.65393					0.144	0.56281					0.144	0.57408
			0.1446	0.24528					0.1446	0.65393					0.1446	0.56199					0.1446	0.57408
			0.1452	0.23961					0.1452	0.65392					0.1452	0.56115					0.1452	0.57408
			0.1458	0.23406					0.1458	0.65392					0.1458	0.56029					0.1458	0.57408
			0.1464	0.22862					0.1464	0.65391					0.1464	0.55941					0.1464	0.57408
			0.147	0.2233					0.147	0.65391					0.147	0.55851					0.147	0.57408
			0.1476	0.2181					0.1476	0.65391					0.1476	0.55759					0.1476	0.57407
			0.1482	0.21302					0.1482	0.6539					0.1482	0.55665					0.1482	0.57407
			0.1488	0.20806					0.1488	0.6539					0.1488	0.55569					0.1488	0.57407
			0.1494	0.20322					0.1494	0.65389					0.1494	0.5547					0.1494	0.57407
			0.15	0.1985					0.15	0.65389					0.15	0.5537					0.15	0.57407
			0.1506	0.19389					0.1506	0.65388					0.1506	0.55267					0.1506	0.57407
			0.1512	0.1894					0.1512	0.65388					0.1512	0.55162					0.1512	0.57407
			0.1518	0.18502					0.1518	0.65387					0.1518	0.55055					0.1518	0.57406
			0.1524	0.18076					0.1524	0.65387					0.1524	0.54945					0.1524	0.57406
			0.153	0.17662					0.153	0.65386					0.153	0.54833					0.153	0.57406
			0.1536	0.17258					0.1536	0.65386					0.1536	0.54719					0.1536	0.57406
			0.1542	0.16866					0.1542	0.65385					0.1542	0.54603					0.1542	0.57406
			0.1548	0.16484					0.1548	0.65385					0.1548	0.54484					0.1548	0.57405
			0.1554	0.16113					0.1554	0.65384					0.1554	0.54362					0.1554	0.57405
			0.156	0.15753					0.156	0.65383					0.156	0.54238					0.156	0.57405
			0.1566	0.15403					0.1566	0.65383					0.1566	0.54112					0.1566	0.57405
			0.1572	0.15063					0.1572	0.65382					0.1572	0.53983					0.1572	0.57404
			0.1578	0.14733					0.1578	0.65381					0.1578	0.53852					0.1578	0.57404
			0.1584	0.14412					0.1584	0.65381					0.1584	0.53718					0.1584	0.57404
			0.159	0.14102					0.159	0.6538					0.159	0.53582					0.159	0.57403
			0.1596	0.138					0.1596	0.65379					0.1596	0.53443					0.1596	0.57403
			0.1602	0.13508					0.1602	0.65378					0.1602	0.53301					0.1602	0.57403
			0.1608	0.13225					0.1608	0.65377					0.1608	0.53157					0.1608	0.57402
			0.1614	0.1295					0.1614	0.65376					0.1614	0.5301					0.1614	0.57402
			0.162	0.12684					0.162	0.65375					0.162	0.52861					0.162	0.57401
			0.1626	0.12426					0.1626	0.65375					0.1626	0.52709					0.1626	0.57401
			0.1632	0.12176					0.1632	0.65374					0.1632	0.52554					0.1632	0.57401
			0.1638	0.11934					0.1638	0.65373					0.1638	0.52397					0.1638	0.574
			0.1644	0.11699					0.1644	0.65372					0.1644	0.52237					0.1644	0.574
			0.165	0.11472					0.165	0.6537					0.165	0.52074					0.165	0.57399
			0.1656	0.11252					0.1656	0.65369					0.1656	0.51908					0.1656	0.57399
			0.1662	0.11039					0.1662	0.65368					0.1662	0.5174					0.1662	0.57398
			0.1668	0.10833					0.1668	0.65367					0.1668	0.51569					0.1668	0.57398
			0.1674	0.10634					0.1674	0.65366					0.1674	0.51396					0.1674	0.57397
			0.168	0.10441					0.168	0.65365					0.168	0.51219					0.168	0.57396
			0.1686	0.10254					0.1686	0.65363					0.1686	0.5104					0.1686	0.57396
			0.1692	0.10073					0.1692	0.65362					0.1692	0.50859					0.1692	0.57395
			0.1698	0.09899					0.1698	0.6536					0.1698	0.50674					0.1698	0.57394
			0.1704	0.09729					0.1704	0.65359					0.1704	0.50487					0.1704	0.57394
			0.171	0.09566					0.171	0.65358					0.171	0.50297					0.171	0.57393
			0.1716	0.09408					0.1716	0.65356					0.1716	0.50105					0.1716	0.57392
			0.1722	0.09254					0.1722	0.65354					0.1722	0.49909					0.1722	0.57391
			0.1728	0.09106					0.1728	0.65353					0.1728	0.49711					0.1728	0.5739
			0.1734	0.08963					0.1734	0.65351					0.1734	0.49511					0.1734	0.57389
			0.174	0.08825					0.174	0.65349					0.174	0.49308					0.174	0.57389
			0.1746	0.08691					0.1746	0.65348					0.1746	0.49102					0.1746	0.57388
			0.1752	0.08561					0.1752	0.65346					0.1752	0.48893					0.1752	0.57387
			0.1758	0.08436					0.1758	0.65344					0.1758	0.48682					0.1758	0.57385
			0.1764	0.08315					0.1764	0.65342					0.1764	0.48468					0.1764	0.57384
			0.177	0.08198					0.177	0.6534					0.177	0.48252					0.177	0.57383
			0.1776	0.08084					0.1776	0.65338					0.1776	0.48033					0.1776	0.57382
			0.1782	0.07975					0.1782	0.65336					0.1782	0.47812					0.1782	0.57381
			0.1788	0.07869					0.1788	0.65333					0.1788	0.47588					0.1788	0.57379
			0.1794	0.07766					0.1794	0.65331					0.1794	0.47361					0.1794	0.57378
			0.18	0.07667					0.18	0.65329					0.18	0.47133					0.18	0.57377
			0.1806	0.07571					0.1806	0.65326					0.1806	0.46901					0.1806	0.57375
			0.1812	0.07479					0.1812	0.65324					0.1812	0.46668					0.1812	0.57374
			0.1818	0.07389					0.1818	0.65321					0.1818	0.46432					0.1818	0.57372
			0.1824	0.07302					0.1824	0.65319					0.1824	0.46194					0.1824	0.5737
			0.183	0.07219					0.183	0.65316					0.183	0.45953					0.183	0.57369
			0.1836	0.07138					0.1836	0.65313					0.1836	0.45711					0.1836	0.57367
			0.1842	0.07059					0.1842	0.6531					0.1842	0.45466					0.1842	0.57365
			0.1848	0.06983					0.1848	0.65307					0.1848	0.45219					0.1848	0.57363
			0.1854	0.0691					0.1854	0.65304					0.1854	0.4497					0.1854	0.57361
			0.186	0.06839					0.186	0.65301					0.186	0.44718					0.186	0.57359
			0.1866	0.06771					0.1866	0.65298					0.1866	0.44465					0.1866	0.57357
			0.1872	0.06704					0.1872	0.65294					0.1872	0.4421					0.1872	0.57355
			0.1878	0.0664					0.1878	0.65291					0.1878	0.43953					0.1878	0.57352
			0.1884	0.06578					0.1884	0.65287					0.1884	0.43694					0.1884	0.5735
			0.189	0.06518					0.189	0.65284					0.189	0.43433					0.189	0.57347
			0.1896	0.0646					0.1896	0.6528					0.1896	0.43171					0.1896	0.57345
			0.1902	0.06403					0.1902	0.65276					0.1902	0.42907					0.1902	0.57342
			0.1908	0.06349					0.1908	0.65272					0.1908	0.42641					0.1908	0.57339
			0.1914	0.06296					0.1914	0.65268					0.1914	0.42373					0.1914	0.57336
			0.192	0.06245					0.192	0.65264					0.192	0.42105					0.192	0.57333
			0.1926	0.06196					0.1926	0.65259					0.1926	0.41834					0.1926	0.5733
			0.1932	0.06148					0.1932	0.65255					0.1932	0.41562					0.1932	0.57327
			0.1938	0.06102					0.1938	0.6525					0.1938	0.41289					0.1938	0.57323
			0.1944	0.06057					0.1944	0.65246					0.1944	0.41015					0.1944	0.5732
			0.195	0.06014					0.195	0.65241					0.195	0.40739					0.195	0.57316
			0.1956	0.05972					0.1956	0.65236					0.1956	0.40463					0.1956	0.57312
			0.1962	0.05932					0.1962	0.65231					0.1962	0.40185					0.1962	0.57308
			0.1968	0.05892					0.1968	0.65225					0.1968	0.39906					0.1968	0.57304
			0.1974	0.05854					0.1974	0.6522					0.1974	0.39626					0.1974	0.573
			0.198	0.05818					0.198	0.65214					0.198	0.39345					0.198	0.57296
			0.1986	0.05782					0.1986	0.65209					0.1986	0.39064					0.1986	0.57291
			0.1992	0.05747					0.1992	0.65203					0.1992	0.38782					0.1992	0.57286
			0.1998	0.05714					0.1998	0.65197					0.1998	0.38499					0.1998	0.57282
			0.2004	0.05682					0.2004	0.65191					0.2004	0.38215					0.2004	0.57276
			0.201	0.0565					0.201	0.65184					0.201	0.37931					0.201	0.57271
			0.2016	0.0562					0.2016	0.65178					0.2016	0.37646					0.2016	0.57266
			0.2022	0.0559					0.2022	0.65171					0.2022	0.37361					0.2022	0.5726
			0.2028	0.05562					0.2028	0.65164					0.2028	0.37076					0.2028	0.57254
			0.2034	0.05534					0.2034	0.65157					0.2034	0.3679					0.2034	0.57248
			0.204	0.05508					0.204	0.6515					0.204	0.36504					0.204	0.57242
			0.2046	0.05482					0.2046	0.65143					0.2046	0.36218					0.2046	0.57235
			0.2052	0.05456					0.2052	0.65135					0.2052	0.35932					0.2052	0.57229
			0.2058	0.05432					0.2058	0.65127					0.2058	0.35646					0.2058	0.57222
			0.2064	0.05409					0.2064	0.65119					0.2064	0.3536					0.2064	0.57214
			0.207	0.05386					0.207	0.65111					0.207	0.35074					0.207	0.57207
			0.2076	0.05363					0.2076	0.65102					0.2076	0.34789					0.2076	0.57199
			0.2082	0.05342					0.2082	0.65094					0.2082	0.34503					0.2082	0.57191
			0.2088	0.05321					0.2088	0.65085					0.2088	0.34218					0.2088	0.57183
			0.2094	0.05301					0.2094	0.65076					0.2094	0.33933					0.2094	0.57174
			0.21	0.05281					0.21	0.65066					0.21	0.33649					0.21	0.57166
			0.2106	0.05262					0.2106	0.65057					0.2106	0.33365					0.2106	0.57156
			0.2112	0.05244					0.2112	0.65047					0.2112	0.33082					0.2112	0.57147
			0.2118	0.05226					0.2118	0.65037					0.2118	0.32799					0.2118	0.57137
			0.2124	0.05209					0.2124	0.65026					0.2124	0.32517					0.2124	0.57127
			0.213	0.05192					0.213	0.65016					0.213	0.32236					0.213	0.57117
			0.2136	0.05176					0.2136	0.65005					0.2136	0.31956					0.2136	0.57106
			0.2142	0.0516					0.2142	0.64994					0.2142	0.31676					0.2142	0.57094
			0.2148	0.05145					0.2148	0.64982					0.2148	0.31398					0.2148	0.57083
			0.2154	0.0513					0.2154	0.6497					0.2154	0.3112					0.2154	0.57071
			0.216	0.05115					0.216	0.64958					0.216	0.30843					0.216	0.57059
			0.2166	0.05101					0.2166	0.64946					0.2166	0.30568					0.2166	0.57046
			0.2172	0.05088					0.2172	0.64933					0.2172	0.30294					0.2172	0.57033
			0.2178	0.05074					0.2178	0.6492					0.2178	0.3002					0.2178	0.57019
			0.2184	0.05062					0.2184	0.64907					0.2184	0.29749					0.2184	0.57005
			0.219	0.05049					0.219	0.64894					0.219	0.29478					0.219	0.5699
			0.2196	0.05037					0.2196	0.6488					0.2196	0.29209					0.2196	0.56975
			0.2202	0.05025					0.2202	0.64865					0.2202	0.28941					0.2202	0.5696
			0.2208	0.05014					0.2208	0.64851					0.2208	0.28674					0.2208	0.56944
			0.2214	0.05003					0.2214	0.64836					0.2214	0.28409					0.2214	0.56927
			0.222	0.04992					0.222	0.6482					0.222	0.28145					0.222	0.5691
			0.2226	0.04982					0.2226	0.64805					0.2226	0.27883					0.2226	0.56893
			0.2232	0.04972					0.2232	0.64789					0.2232	0.27623					0.2232	0.56874
			0.2238	0.04962					0.2238	0.64772					0.2238	0.27364					0.2238	0.56856
			0.2244	0.04953					0.2244	0.64755					0.2244	0.27107					0.2244	0.56836
			0.225	0.04943					0.225	0.64738					0.225	0.26851					0.225	0.56816
			0.2256	0.04934					0.2256	0.6472					0.2256	0.26597					0.2256	0.56796
			0.2262	0.04926					0.2262	0.64702					0.2262	0.26345					0.2262	0.56774
			0.2268	0.04917					0.2268	0.64684					0.2268	0.26095					0.2268	0.56752
			0.2274	0.04909					0.2274	0.64665					0.2274	0.25847					0.2274	0.5673
			0.228	0.04901					0.228	0.64645					0.228	0.256					0.228	0.56707
			0.2286	0.04893					0.2286	0.64625					0.2286	0.25355					0.2286	0.56682
			0.2292	0.04885					0.2292	0.64605					0.2292	0.25112					0.2292	0.56658
			0.2298	0.04878					0.2298	0.64584					0.2298	0.24871					0.2298	0.56632
			0.2304	0.04871					0.2304	0.64563					0.2304	0.24632					0.2304	0.56606
			0.231	0.04864					0.231	0.64541					0.231	0.24395					0.231	0.56579
			0.2316	0.04857					0.2316	0.64519					0.2316	0.2416					0.2316	0.56551
			0.2322	0.04851					0.2322	0.64496					0.2322	0.23927					0.2322	0.56522
			0.2328	0.04844					0.2328	0.64473					0.2328	0.23696					0.2328	0.56492
			0.2334	0.04838					0.2334	0.64449					0.2334	0.23466					0.2334	0.56462
			0.234	0.04832					0.234	0.64425					0.234	0.23239					0.234	0.5643
			0.2346	0.04826					0.2346	0.644					0.2346	0.23014					0.2346	0.56398
			0.2352	0.0482					0.2352	0.64375					0.2352	0.22791					0.2352	0.56364
			0.2358	0.04815					0.2358	0.64349					0.2358	0.2257					0.2358	0.5633
			0.2364	0.0481					0.2364	0.64322					0.2364	0.22352					0.2364	0.56295
			0.237	0.04804					0.237	0.64295					0.237	0.22135					0.237	0.56258
			0.2376	0.04799					0.2376	0.64267					0.2376	0.2192					0.2376	0.56221
			0.2382	0.04794					0.2382	0.64239					0.2382	0.21708					0.2382	0.56182
			0.2388	0.04789					0.2388	0.6421					0.2388	0.21497					0.2388	0.56142
			0.2394	0.04785					0.2394	0.6418					0.2394	0.21289					0.2394	0.56101
			0.24	0.0478					0.24	0.6415					0.24	0.21083					0.24	0.56059
			0.2406	0.04776					0.2406	0.64119					0.2406	0.20879					0.2406	0.56016
			0.2412	0.04771					0.2412	0.64088					0.2412	0.20677					0.2412	0.55972
			0.2418	0.04767					0.2418	0.64055					0.2418	0.20477					0.2418	0.55926
			0.2424	0.04763					0.2424	0.64022					0.2424	0.20279					0.2424	0.55879
			0.243	0.04759					0.243	0.63989					0.243	0.20084					0.243	0.55831
			0.2436	0.04755					0.2436	0.63954					0.2436	0.1989					0.2436	0.55781
			0.2442	0.04751					0.2442	0.63919					0.2442	0.19699					0.2442	0.5573
			0.2448	0.04748					0.2448	0.63884					0.2448	0.1951					0.2448	0.55677
			0.2454	0.04744					0.2454	0.63847					0.2454	0.19323					0.2454	0.55623
			0.246	0.04741					0.246	0.6381					0.246	0.19138					0.246	0.55568
			0.2466	0.04737					0.2466	0.63771					0.2466	0.18955					0.2466	0.55511
			0.2472	0.04734					0.2472	0.63733					0.2472	0.18774					0.2472	0.55452
			0.2478	0.04731					0.2478	0.63693					0.2478	0.18595					0.2478	0.55392
			0.2484	0.04728					0.2484	0.63652					0.2484	0.18419					0.2484	0.55331
			0.249	0.04725					0.249	0.63611					0.249	0.18244					0.249	0.55267
			0.2496	0.04722					0.2496	0.63569					0.2496	0.18072					0.2496	0.55202
			0.2502	0.04719					0.2502	0.63526					0.2502	0.17901					0.2502	0.55136
			0.2508	0.04716					0.2508	0.63482					0.2508	0.17733					0.2508	0.55067
			0.2514	0.04713					0.2514	0.63437					0.2514	0.17566					0.2514	0.54997
			0.252	0.0471					0.252	0.63391					0.252	0.17402					0.252	0.54925
			0.2526	0.04708					0.2526	0.63345					0.2526	0.1724					0.2526	0.54851
			0.2532	0.04705					0.2532	0.63297					0.2532	0.17079					0.2532	0.54775
			0.2538	0.04703					0.2538	0.63249					0.2538	0.16921					0.2538	0.54697
			0.2544	0.047					0.2544	0.63199					0.2544	0.16765					0.2544	0.54617
			0.255	0.04698					0.255	0.63149					0.255	0.1661					0.255	0.54535
			0.2556	0.04696					0.2556	0.63097					0.2556	0.16458					0.2556	0.54452
			0.2562	0.04694					0.2562	0.63045					0.2562	0.16307					0.2562	0.54366
			0.2568	0.04691					0.2568	0.62991					0.2568	0.16159					0.2568	0.54278
			0.2574	0.04689					0.2574	0.62937					0.2574	0.16012					0.2574	0.54187
			0.258	0.04687					0.258	0.62881					0.258	0.15867					0.258	0.54095
			0.2586	0.04685					0.2586	0.62825					0.2586	0.15724					0.2586	0.54
			0.2592	0.04683					0.2592	0.62767					0.2592	0.15583					0.2592	0.53903
			0.2598	0.04681					0.2598	0.62709					0.2598	0.15444					0.2598	0.53804
			0.2604	0.04679					0.2604	0.62649					0.2604	0.15306					0.2604	0.53702
			0.261	0.04678					0.261	0.62588					0.261	0.15171					0.261	0.53598
			0.2616	0.04676					0.2616	0.62526					0.2616	0.15037					0.2616	0.53492
			0.2622	0.04674					0.2622	0.62462					0.2622	0.14905					0.2622	0.53383
			0.2628	0.04672					0.2628	0.62398					0.2628	0.14774					0.2628	0.53271
			0.2634	0.04671					0.2634	0.62332					0.2634	0.14646					0.2634	0.53157
			0.264	0.04669					0.264	0.62266					0.264	0.14519					0.264	0.53041
			0.2646	0.04668					0.2646	0.62198					0.2646	0.14394					0.2646	0.52921
			0.2652	0.04666					0.2652	0.62129					0.2652	0.14271					0.2652	0.52799
			0.2658	0.04665					0.2658	0.62058					0.2658	0.14149					0.2658	0.52675
			0.2664	0.04663					0.2664	0.61986					0.2664	0.14029					0.2664	0.52548
			0.267	0.04662					0.267	0.61913					0.267	0.1391					0.267	0.52418
			0.2676	0.0466					0.2676	0.61839					0.2676	0.13793					0.2676	0.52285
			0.2682	0.04659					0.2682	0.61764					0.2682	0.13678					0.2682	0.52149
			0.2688	0.04658					0.2688	0.61687					0.2688	0.13565					0.2688	0.5201
			0.2694	0.04656					0.2694	0.61608					0.2694	0.13453					0.2694	0.51869
			0.27	0.04655					0.27	0.61529					0.27	0.13342					0.27	0.51724
			0.2706	0.04654					0.2706	0.61448					0.2706	0.13233					0.2706	0.51577
			0.2712	0.04653					0.2712	0.61366					0.2712	0.13126					0.2712	0.51427
			0.2718	0.04652					0.2718	0.61282					0.2718	0.1302					0.2718	0.51273
			0.2724	0.0465					0.2724	0.61197					0.2724	0.12915					0.2724	0.51117
			0.273	0.04649					0.273	0.6111					0.273	0.12812					0.273	0.50958
			0.2736	0.04648					0.2736	0.61022					0.2736	0.12711					0.2736	0.50795
			0.2742	0.04647					0.2742	0.60933					0.2742	0.12611					0.2742	0.50629
			0.2748	0.04646					0.2748	0.60842					0.2748	0.12512					0.2748	0.5046
			0.2754	0.04645					0.2754	0.60749					0.2754	0.12415					0.2754	0.50288
			0.276	0.04644					0.276	0.60655					0.276	0.12319					0.276	0.50113
			0.2766	0.04643					0.2766	0.6056					0.2766	0.12224					0.2766	0.49935
			0.2772	0.04642					0.2772	0.60463					0.2772	0.12131					0.2772	0.49753
			0.2778	0.04641					0.2778	0.60365					0.2778	0.12039					0.2778	0.49569
			0.2784	0.0464					0.2784	0.60265					0.2784	0.11948					0.2784	0.49381
			0.279	0.0464					0.279	0.60163					0.279	0.11859					0.279	0.49189
			0.2796	0.04639					0.2796	0.6006					0.2796	0.11771					0.2796	0.48995
			0.2802	0.04638					0.2802	0.59955					0.2802	0.11684					0.2802	0.48797
			0.2808	0.04637					0.2808	0.59849					0.2808	0.11599					0.2808	0.48596
			0.2814	0.04636					0.2814	0.5974					0.2814	0.11515					0.2814	0.48391
			0.282	0.04635					0.282	0.59631					0.282	0.11432					0.282	0.48184
			0.2826	0.04635					0.2826	0.5952					0.2826	0.1135					0.2826	0.47973
			0.2832	0.04634					0.2832	0.59407					0.2832	0.11269					0.2832	0.47759
			0.2838	0.04633					0.2838	0.59292					0.2838	0.1119					0.2838	0.47541
			0.2844	0.04633					0.2844	0.59176					0.2844	0.11111					0.2844	0.4732
			0.285	0.04632					0.285	0.59058					0.285	0.11034					0.285	0.47096
			0.2856	0.04631					0.2856	0.58938					0.2856	0.10958					0.2856	0.46869
			0.2862	0.0463					0.2862	0.58817					0.2862	0.10883					0.2862	0.46639
			0.2868	0.0463					0.2868	0.58693					0.2868	0.10809					0.2868	0.46405
			0.2874	0.04629					0.2874	0.58569					0.2874	0.10737					0.2874	0.46168
			0.288	0.04629					0.288	0.58442					0.288	0.10665					0.288	0.45928
			0.2886	0.04628					0.2886	0.58314					0.2886	0.10594					0.2886	0.45685
			0.2892	0.04627					0.2892	0.58184					0.2892	0.10524					0.2892	0.45439
			0.2898	0.04627					0.2898	0.58052					0.2898	0.10456					0.2898	0.45189
			0.2904	0.04626					0.2904	0.57918					0.2904	0.10388					0.2904	0.44937
			0.291	0.04626					0.291	0.57783					0.291	0.10321					0.291	0.44682
			0.2916	0.04625					0.2916	0.57645					0.2916	0.10256					0.2916	0.44423
			0.2922	0.04625					0.2922	0.57506					0.2922	0.10191					0.2922	0.44162
			0.2928	0.04624					0.2928	0.57366					0.2928	0.10127					0.2928	0.43898
			0.2934	0.04624					0.2934	0.57223					0.2934	0.10064					0.2934	0.43631
			0.294	0.04623					0.294	0.57079					0.294	0.10003					0.294	0.43361
			0.2946	0.04623					0.2946	0.56932					0.2946	0.09942					0.2946	0.43088
			0.2952	0.04622					0.2952	0.56784					0.2952	0.09881					0.2952	0.42813
			0.2958	0.04622					0.2958	0.56634					0.2958	0.09822					0.2958	0.42535
			0.2964	0.04621					0.2964	0.56483					0.2964	0.09764					0.2964	0.42255
			0.297	0.04621					0.297	0.56329					0.297	0.09706					0.297	0.41972
			0.2976	0.0462					0.2976	0.56174					0.2976	0.0965					0.2976	0.41686
			0.2982	0.0462					0.2982	0.56017					0.2982	0.09594					0.2982	0.41398
			0.2988	0.0462					0.2988	0.55858					0.2988	0.09539					0.2988	0.41108
			0.2994	0.04619					0.2994	0.55697					0.2994	0.09485					0.2994	0.40816
			0.3	0.04619					0.3	0.55534					0.3	0.09431					0.3	0.40521
			0.3006	0.04618					0.3006	0.5537					0.3006	0.09379					0.3006	0.40225
			0.3012	0.04618					0.3012	0.55203					0.3012	0.09327					0.3012	0.39926
			0.3018	0.04618					0.3018	0.55035					0.3018	0.09276					0.3018	0.39626
			0.3024	0.04617					0.3024	0.54865					0.3024	0.09225					0.3024	0.39323
			0.303	0.04617					0.303	0.54694					0.303	0.09176					0.303	0.39019
			0.3036	0.04617					0.3036	0.5452					0.3036	0.09127					0.3036	0.38713
			0.3042	0.04616					0.3042	0.54345					0.3042	0.09079					0.3042	0.38406
			0.3048	0.04616					0.3048	0.54168					0.3048	0.09031					0.3048	0.38097
			0.3054	0.04616					0.3054	0.53989					0.3054	0.08984					0.3054	0.37786
			0.306	0.04615					0.306	0.53808					0.306	0.08938					0.306	0.37475
			0.3066	0.04615					0.3066	0.53626					0.3066	0.08893					0.3066	0.37162
			0.3072	0.04615					0.3072	0.53441					0.3072	0.08848					0.3072	0.36848
			0.3078	0.04614					0.3078	0.53255					0.3078	0.08804					0.3078	0.36532
			0.3084	0.04614					0.3084	0.53068					0.3084	0.08761					0.3084	0.36216
			0.309	0.04614					0.309	0.52878					0.309	0.08718					0.309	0.35899
			0.3096	0.04614					0.3096	0.52687					0.3096	0.08676					0.3096	0.35582
			0.3102	0.04613					0.3102	0.52494					0.3102	0.08634					0.3102	0.35263
			0.3108	0.04613					0.3108	0.52299					0.3108	0.08593					0.3108	0.34944
			0.3114	0.04613					0.3114	0.52103					0.3114	0.08553					0.3114	0.34625
			0.312	0.04612					0.312	0.51905					0.312	0.08513					0.312	0.34305
			0.3126	0.04612					0.3126	0.51706					0.3126	0.08474					0.3126	0.33985
			0.3132	0.04612					0.3132	0.51504					0.3132	0.08435					0.3132	0.33665
			0.3138	0.04612					0.3138	0.51301					0.3138	0.08397					0.3138	0.33345
			0.3144	0.04611					0.3144	0.51097					0.3144	0.0836					0.3144	0.33025
			0.315	0.04611					0.315	0.50891					0.315	0.08323					0.315	0.32704
			0.3156	0.04611					0.3156	0.50683					0.3156	0.08287					0.3156	0.32385
			0.3162	0.04611					0.3162	0.50474					0.3162	0.08251					0.3162	0.32065
			0.3168	0.04611					0.3168	0.50264					0.3168	0.08215					0.3168	0.31746
			0.3174	0.0461					0.3174	0.50051					0.3174	0.0818					0.3174	0.31427
			0.318	0.0461					0.318	0.49838					0.318	0.08146					0.318	0.31109
			0.3186	0.0461					0.3186	0.49623					0.3186	0.08112					0.3186	0.30792
			0.3192	0.0461					0.3192	0.49406					0.3192	0.08079					0.3192	0.30475
			0.3198	0.0461					0.3198	0.49188					0.3198	0.08046					0.3198	0.30159
			0.3204	0.04609					0.3204	0.48969					0.3204	0.08014					0.3204	0.29845
			0.321	0.04609					0.321	0.48748					0.321	0.07982					0.321	0.29531
			0.3216	0.04609					0.3216	0.48526					0.3216	0.0795					0.3216	0.29218
			0.3222	0.04609					0.3222	0.48303					0.3222	0.07919					0.3222	0.28907
			0.3228	0.04609					0.3228	0.48078					0.3228	0.07889					0.3228	0.28597
			0.3234	0.04609					0.3234	0.47852					0.3234	0.07859					0.3234	0.28288
			0.324	0.04608					0.324	0.47625					0.324	0.07829					0.324	0.27981
			0.3246	0.04608					0.3246	0.47397					0.3246	0.078					0.3246	0.27676
			0.3252	0.04608					0.3252	0.47168					0.3252	0.07771					0.3252	0.27372
			0.3258	0.04608					0.3258	0.46937					0.3258	0.07743					0.3258	0.27069
			0.3264	0.04608					0.3264	0.46705					0.3264	0.07715					0.3264	0.26769
			0.327	0.04608					0.327	0.46473					0.327	0.07687					0.327	0.2647
			0.3276	0.04607					0.3276	0.46239					0.3276	0.0766					0.3276	0.26173
			0.3282	0.04607					0.3282	0.46004					0.3282	0.07633					0.3282	0.25878
			0.3288	0.04607					0.3288	0.45768					0.3288	0.07607					0.3288	0.25585
			0.3294	0.04607					0.3294	0.45532					0.3294	0.07581					0.3294	0.25295
			0.33	0.04607					0.33	0.45294					0.33	0.07555					0.33	0.25006
			0.3306	0.04607					0.3306	0.45055					0.3306	0.0753					0.3306	0.2472
			0.3312	0.04607					0.3312	0.44816					0.3312	0.07505					0.3312	0.24436
			0.3318	0.04606					0.3318	0.44576					0.3318	0.0748					0.3318	0.24154
			0.3324	0.04606					0.3324	0.44335					0.3324	0.07456					0.3324	0.23874
			0.333	0.04606					0.333	0.44093					0.333	0.07432					0.333	0.23597
			0.3336	0.04606					0.3336	0.43851					0.3336	0.07408					0.3336	0.23322
			0.3342	0.04606					0.3342	0.43608					0.3342	0.07385					0.3342	0.2305
			0.3348	0.04606					0.3348	0.43364					0.3348	0.07362					0.3348	0.2278
			0.3354	0.04606					0.3354	0.4312					0.3354	0.0734					0.3354	0.22513
			0.336	0.04606					0.336	0.42875					0.336	0.07317					0.336	0.22249
			0.3366	0.04605					0.3366	0.4263					0.3366	0.07296					0.3366	0.21987
			0.3372	0.04605					0.3372	0.42384					0.3372	0.07274					0.3372	0.21728
			0.3378	0.04605					0.3378	0.42138					0.3378	0.07253					0.3378	0.21471
			0.3384	0.04605					0.3384	0.41891					0.3384	0.07232					0.3384	0.21217
			0.339	0.04605					0.339	0.41644					0.339	0.07211					0.339	0.20966
			0.3396	0.04605					0.3396	0.41397					0.3396	0.0719					0.3396	0.20718
			0.3402	0.04605					0.3402	0.41149					0.3402	0.0717					0.3402	0.20472
			0.3408	0.04605					0.3408	0.40901					0.3408	0.0715					0.3408	0.20229
			0.3414	0.04605					0.3414	0.40653					0.3414	0.07131					0.3414	0.19989
			0.342	0.04605					0.342	0.40405					0.342	0.07112					0.342	0.19752
			0.3426	0.04604					0.3426	0.40156					0.3426	0.07093					0.3426	0.19517
			0.3432	0.04604					0.3432	0.39908					0.3432	0.07074					0.3432	0.19286
			0.3438	0.04604					0.3438	0.39659					0.3438	0.07055					0.3438	0.19057
			0.3444	0.04604					0.3444	0.3941					0.3444	0.07037					0.3444	0.18831
			0.345	0.04604					0.345	0.39162					0.345	0.07019					0.345	0.18608
			0.3456	0.04604					0.3456	0.38913					0.3456	0.07001					0.3456	0.18388
			0.3462	0.04604					0.3462	0.38665					0.3462	0.06984					0.3462	0.18171
			0.3468	0.04604					0.3468	0.38416					0.3468	0.06967					0.3468	0.17956
			0.3474	0.04604					0.3474	0.38168					0.3474	0.0695					0.3474	0.17744
			0.348	0.04604					0.348	0.3792					0.348	0.06933					0.348	0.17536
			0.3486	0.04604					0.3486	0.37672					0.3486	0.06916					0.3486	0.1733
			0.3492	0.04604					0.3492	0.37424					0.3492	0.069					0.3492	0.17127
			0.3498	0.04604					0.3498	0.37177					0.3498	0.06884					0.3498	0.16926
			0.3504	0.04603					0.3504	0.3693					0.3504	0.06868					0.3504	0.16729
			0.351	0.04603					0.351	0.36684					0.351	0.06852					0.351	0.16534
			0.3516	0.04603					0.3516	0.36438					0.3516	0.06837					0.3516	0.16342
			0.3522	0.04603					0.3522	0.36192					0.3522	0.06822					0.3522	0.16153
			0.3528	0.04603					0.3528	0.35947					0.3528	0.06807					0.3528	0.15966
			0.3534	0.04603					0.3534	0.35702					0.3534	0.06792					0.3534	0.15783
			0.354	0.04603					0.354	0.35458					0.354	0.06777					0.354	0.15602
			0.3546	0.04603					0.3546	0.35214					0.3546	0.06763					0.3546	0.15424
			0.3552	0.04603					0.3552	0.34971					0.3552	0.06749					0.3552	0.15248
			0.3558	0.04603					0.3558	0.34729					0.3558	0.06735					0.3558	0.15075
			0.3564	0.04603					0.3564	0.34487					0.3564	0.06721					0.3564	0.14905
			0.357	0.04603					0.357	0.34246					0.357	0.06707					0.357	0.14737
			0.3576	0.04603					0.3576	0.34006					0.3576	0.06694					0.3576	0.14572
			0.3582	0.04603					0.3582	0.33766					0.3582	0.06681					0.3582	0.1441
			0.3588	0.04603					0.3588	0.33527					0.3588	0.06668					0.3588	0.1425
			0.3594	0.04603					0.3594	0.33289					0.3594	0.06655					0.3594	0.14093
			0.36	0.04602					0.36	0.33052					0.36	0.06642					0.36	0.13938
			0.3606	0.04602					0.3606	0.32816					0.3606	0.06629					0.3606	0.13786
			0.3612	0.04602					0.3612	0.32581					0.3612	0.06617					0.3612	0.13636
			0.3618	0.04602					0.3618	0.32347					0.3618	0.06605					0.3618	0.13489
			0.3624	0.04602					0.3624	0.32113					0.3624	0.06593					0.3624	0.13344
			0.363	0.04602					0.363	0.31881					0.363	0.06581					0.363	0.13201
			0.3636	0.04602					0.3636	0.31649					0.3636	0.06569					0.3636	0.13061
			0.3642	0.04602					0.3642	0.31419					0.3642	0.06557					0.3642	0.12923
			0.3648	0.04602					0.3648	0.3119					0.3648	0.06546					0.3648	0.12787
			0.3654	0.04602					0.3654	0.30961					0.3654	0.06535					0.3654	0.12654
			0.366	0.04602					0.366	0.30734					0.366	0.06524					0.366	0.12523
			0.3666	0.04602					0.3666	0.30508					0.3666	0.06513					0.3666	0.12394
			0.3672	0.04602					0.3672	0.30283					0.3672	0.06502					0.3672	0.12267
			0.3678	0.04602					0.3678	0.3006					0.3678	0.06491					0.3678	0.12143
			0.3684	0.04602					0.3684	0.29837					0.3684	0.06481					0.3684	0.1202
			0.369	0.04602					0.369	0.29616					0.369	0.0647					0.369	0.119
			0.3696	0.04602					0.3696	0.29396					0.3696	0.0646					0.3696	0.11782
			0.3702	0.04602					0.3702	0.29177					0.3702	0.0645					0.3702	0.11666
			0.3708	0.04602					0.3708	0.28959					0.3708	0.0644					0.3708	0.11552
			0.3714	0.04602					0.3714	0.28743					0.3714	0.0643					0.3714	0.1144
			0.372	0.04602					0.372	0.28528					0.372	0.0642					0.372	0.1133
			0.3726	0.04602					0.3726	0.28314					0.3726	0.06411					0.3726	0.11221
			0.3732	0.04602					0.3732	0.28102					0.3732	0.06401					0.3732	0.11115
			0.3738	0.04601					0.3738	0.27891					0.3738	0.06392					0.3738	0.11011
			0.3744	0.04601					0.3744	0.27681					0.3744	0.06383					0.3744	0.10908
			0.375	0.04601					0.375	0.27473					0.375	0.06374					0.375	0.10808
			0.3756	0.04601					0.3756	0.27266					0.3756	0.06365					0.3756	0.10709
			0.3762	0.04601					0.3762	0.27061					0.3762	0.06356					0.3762	0.10612
			0.3768	0.04601					0.3768	0.26857					0.3768	0.06347					0.3768	0.10516
			0.3774	0.04601					0.3774	0.26654					0.3774	0.06338					0.3774	0.10423
			0.378	0.04601					0.378	0.26453					0.378	0.0633					0.378	0.10331
			0.3786	0.04601					0.3786	0.26253					0.3786	0.06321					0.3786	0.1024
			0.3792	0.04601					0.3792	0.26054					0.3792	0.06313					0.3792	0.10152
			0.3798	0.04601					0.3798	0.25857					0.3798	0.06305					0.3798	0.10065
			0.3804	0.04601					0.3804	0.25662					0.3804	0.06297					0.3804	0.09979
			0.381	0.04601					0.381	0.25468					0.381	0.06289					0.381	0.09895
			0.3816	0.04601					0.3816	0.25275					0.3816	0.06281					0.3816	0.09813
			0.3822	0.04601					0.3822	0.25084					0.3822	0.06273					0.3822	0.09732
			0.3828	0.04601					0.3828	0.24895					0.3828	0.06266					0.3828	0.09653
			0.3834	0.04601					0.3834	0.24707					0.3834	0.06258					0.3834	0.09575
			0.384	0.04601					0.384	0.2452					0.384	0.06251					0.384	0.09498
			0.3846	0.04601					0.3846	0.24335					0.3846	0.06243					0.3846	0.09423
			0.3852	0.04601					0.3852	0.24151					0.3852	0.06236					0.3852	0.0935
			0.3858	0.04601					0.3858	0.23969					0.3858	0.06229					0.3858	0.09278
			0.3864	0.04601					0.3864	0.23789					0.3864	0.06222					0.3864	0.09207
			0.387	0.04601					0.387	0.2361					0.387	0.06215					0.387	0.09137
			0.3876	0.04601					0.3876	0.23432					0.3876	0.06208					0.3876	0.09069
			0.3882	0.04601					0.3882	0.23256					0.3882	0.06201					0.3882	0.09002
			0.3888	0.04601					0.3888	0.23082					0.3888	0.06194					0.3888	0.08936
			0.3894	0.04601					0.3894	0.22909					0.3894	0.06187					0.3894	0.08871
			0.39	0.04601					0.39	0.22738					0.39	0.06181					0.39	0.08808
			0.3906	0.04601					0.3906	0.22568					0.3906	0.06174					0.3906	0.08746
			0.3912	0.04601					0.3912	0.22399					0.3912	0.06168					0.3912	0.08685
			0.3918	0.04601					0.3918	0.22233					0.3918	0.06162					0.3918	0.08625
			0.3924	0.04601					0.3924	0.22067					0.3924	0.06155					0.3924	0.08566
			0.393	0.04601					0.393	0.21903					0.393	0.06149					0.393	0.08508
			0.3936	0.04601					0.3936	0.21741					0.3936	0.06143					0.3936	0.08452
			0.3942	0.04601					0.3942	0.2158					0.3942	0.06137					0.3942	0.08396
			0.3948	0.04601					0.3948	0.21421					0.3948	0.06131					0.3948	0.08342
			0.3954	0.04601					0.3954	0.21263					0.3954	0.06125					0.3954	0.08289
			0.396	0.04601					0.396	0.21107					0.396	0.06119					0.396	0.08236
			0.3966	0.04601					0.3966	0.20952					0.3966	0.06114					0.3966	0.08185
			0.3972	0.046					0.3972	0.20799					0.3972	0.06108					0.3972	0.08134
			0.3978	0.046					0.3978	0.20647					0.3978	0.06103					0.3978	0.08085
			0.3984	0.046					0.3984	0.20497					0.3984	0.06097					0.3984	0.08036
			0.399	0.046					0.399	0.20348					0.399	0.06092					0.399	0.07989
			0.3996	0.046					0.3996	0.20201					0.3996	0.06086					0.3996	0.07942
			0.4002	0.046					0.4002	0.20055					0.4002	0.06081					0.4002	0.07896
			0.4008	0.046					0.4008	0.19911					0.4008	0.06076					0.4008	0.07851
			0.4014	0.046					0.4014	0.19768					0.4014	0.0607					0.4014	0.07807
			0.402	0.046					0.402	0.19626					0.402	0.06065					0.402	0.07763
			0.4026	0.046					0.4026	0.19486					0.4026	0.0606					0.4026	0.07721
			0.4032	0.046					0.4032	0.19348					0.4032	0.06055					0.4032	0.07679
			0.4038	0.046					0.4038	0.19211					0.4038	0.0605					0.4038	0.07638
			0.4044	0.046					0.4044	0.19075					0.4044	0.06046					0.4044	0.07598
			0.405	0.046					0.405	0.18941					0.405	0.06041					0.405	0.07559
			0.4056	0.046					0.4056	0.18808					0.4056	0.06036					0.4056	0.0752
			0.4062	0.046					0.4062	0.18676					0.4062	0.06031					0.4062	0.07482
			0.4068	0.046					0.4068	0.18546					0.4068	0.06027					0.4068	0.07445
			0.4074	0.046					0.4074	0.18417					0.4074	0.06022					0.4074	0.07409
			0.408	0.046					0.408	0.1829					0.408	0.06018					0.408	0.07373
			0.4086	0.046					0.4086	0.18164					0.4086	0.06013					0.4086	0.07338
			0.4092	0.046					0.4092	0.18039					0.4092	0.06009					0.4092	0.07304
			0.4098	0.046					0.4098	0.17916					0.4098	0.06004					0.4098	0.0727
			0.4104	0.046					0.4104	0.17794					0.4104	0.06					0.4104	0.07237
			0.411	0.046					0.411	0.17674					0.411	0.05996					0.411	0.07204
			0.4116	0.046					0.4116	0.17554					0.4116	0.05992					0.4116	0.07172
			0.4122	0.046					0.4122	0.17436					0.4122	0.05987					0.4122	0.07141
			0.4128	0.046					0.4128	0.1732					0.4128	0.05983					0.4128	0.0711
			0.4134	0.046					0.4134	0.17204					0.4134	0.05979					0.4134	0.0708
			0.414	0.046					0.414	0.1709					0.414	0.05975					0.414	0.07051
			0.4146	0.046					0.4146	0.16977					0.4146	0.05971					0.4146	0.07022
			0.4152	0.046					0.4152	0.16866					0.4152	0.05968					0.4152	0.06993
			0.4158	0.046					0.4158	0.16756					0.4158	0.05964					0.4158	0.06965
			0.4164	0.046					0.4164	0.16647					0.4164	0.0596					0.4164	0.06938
			0.417	0.046					0.417	0.16539					0.417	0.05956					0.417	0.06911
			0.4176	0.046					0.4176	0.16432					0.4176	0.05952					0.4176	0.06885
			0.4182	0.046					0.4182	0.16327					0.4182	0.05949					0.4182	0.06859
			0.4188	0.046					0.4188	0.16223					0.4188	0.05945					0.4188	0.06833
			0.4194	0.046					0.4194	0.1612					0.4194	0.05941					0.4194	0.06809
			0.42	0.046					0.42	0.16018					0.42	0.05938					0.42	0.06784
			0.4206	0.046					0.4206	0.15917					0.4206	0.05934					0.4206	0.0676
			0.4212	0.046					0.4212	0.15818					0.4212	0.05931					0.4212	0.06737
			0.4218	0.046					0.4218	0.1572					0.4218	0.05928					0.4218	0.06714
			0.4224	0.046					0.4224	0.15623					0.4224	0.05924					0.4224	0.06691
			0.423	0.046					0.423	0.15527					0.423	0.05921					0.423	0.06669
			0.4236	0.046					0.4236	0.15432					0.4236	0.05918					0.4236	0.06647
			0.4242	0.046					0.4242	0.15338					0.4242	0.05914					0.4242	0.06625
			0.4248	0.046					0.4248	0.15245					0.4248	0.05911					0.4248	0.06604
			0.4254	0.046					0.4254	0.15154					0.4254	0.05908					0.4254	0.06584
			0.426	0.046					0.426	0.15063					0.426	0.05905					0.426	0.06564
			0.4266	0.046					0.4266	0.14974					0.4266	0.05902					0.4266	0.06544
			0.4272	0.046					0.4272	0.14885					0.4272	0.05899					0.4272	0.06524
			0.4278	0.046					0.4278	0.14798					0.4278	0.05896					0.4278	0.06505
			0.4284	0.046					0.4284	0.14712					0.4284	0.05893					0.4284	0.06487
			0.429	0.046					0.429	0.14627					0.429	0.0589					0.429	0.06468
			0.4296	0.046					0.4296	0.14542					0.4296	0.05887					0.4296	0.0645
			0.4302	0.046					0.4302	0.14459					0.4302	0.05884					0.4302	0.06432
			0.4308	0.046					0.4308	0.14377					0.4308	0.05881					0.4308	0.06415
			0.4314	0.046					0.4314	0.14296					0.4314	0.05878					0.4314	0.06398
			0.432	0.046					0.432	0.14216					0.432	0.05875					0.432	0.06381
			0.4326	0.046					0.4326	0.14136					0.4326	0.05872					0.4326	0.06365
			0.4332	0.046					0.4332	0.14058					0.4332	0.0587					0.4332	0.06349
			0.4338	0.046					0.4338	0.13981					0.4338	0.05867					0.4338	0.06333
			0.4344	0.046					0.4344	0.13904					0.4344	0.05864					0.4344	0.06317
			0.435	0.046					0.435	0.13829					0.435	0.05862					0.435	0.06302
			0.4356	0.046					0.4356	0.13754					0.4356	0.05859					0.4356	0.06287
			0.4362	0.046					0.4362	0.13681					0.4362	0.05857					0.4362	0.06272
			0.4368	0.046					0.4368	0.13608					0.4368	0.05854					0.4368	0.06258
			0.4374	0.046					0.4374	0.13536					0.4374	0.05851					0.4374	0.06244
			0.438	0.046					0.438	0.13465					0.438	0.05849					0.438	0.0623
			0.4386	0.046					0.4386	0.13395					0.4386	0.05847					0.4386	0.06216
			0.4392	0.046					0.4392	0.13326					0.4392	0.05844					0.4392	0.06203
			0.4398	0.046					0.4398	0.13257					0.4398	0.05842					0.4398	0.0619
			0.4404	0.046					0.4404	0.1319					0.4404	0.05839					0.4404	0.06177
			0.441	0.046					0.441	0.13123					0.441	0.05837					0.441	0.06164
			0.4416	0.046					0.4416	0.13057					0.4416	0.05835					0.4416	0.06152
			0.4422	0.046					0.4422	0.12992					0.4422	0.05832					0.4422	0.0614
			0.4428	0.046					0.4428	0.12928					0.4428	0.0583					0.4428	0.06128
			0.4434	0.046					0.4434	0.12864					0.4434	0.05828					0.4434	0.06116
			0.444	0.046					0.444	0.12802					0.444	0.05826					0.444	0.06104
			0.4446	0.046					0.4446	0.1274					0.4446	0.05823					0.4446	0.06093
			0.4452	0.046					0.4452	0.12679					0.4452	0.05821					0.4452	0.06082
			0.4458	0.046					0.4458	0.12618					0.4458	0.05819					0.4458	0.06071
			0.4464	0.046					0.4464	0.12559					0.4464	0.05817					0.4464	0.0606
			0.447	0.046					0.447	0.125					0.447	0.05815					0.447	0.0605
			0.4476	0.046					0.4476	0.12442					0.4476	0.05813					0.4476	0.06039
			0.4482	0.046					0.4482	0.12384					0.4482	0.05811					0.4482	0.06029
			0.4488	0.046					0.4488	0.12328					0.4488	0.05809					0.4488	0.06019
			0.4494	0.046					0.4494	0.12272					0.4494	0.05807					0.4494	0.06009
			0.45	0.046					0.45	0.12216					0.45	0.05805					0.45	0.06
			0.4506	0.046					0.4506	0.12162					0.4506	0.05803					0.4506	0.0599
			0.4512	0.046					0.4512	0.12108					0.4512	0.05801					0.4512	0.05981
			0.4518	0.046					0.4518	0.12055					0.4518	0.05799					0.4518	0.05972
			0.4524	0.046					0.4524	0.12002					0.4524	0.05797					0.4524	0.05963
			0.453	0.046					0.453	0.1195					0.453	0.05795					0.453	0.05954
			0.4536	0.046					0.4536	0.11899					0.4536	0.05793					0.4536	0.05946
			0.4542	0.046					0.4542	0.11848					0.4542	0.05791					0.4542	0.05937
			0.4548	0.046					0.4548	0.11798					0.4548	0.0579					0.4548	0.05929
			0.4554	0.046					0.4554	0.11749					0.4554	0.05788					0.4554	0.05921
			0.456	0.046					0.456	0.117					0.456	0.05786					0.456	0.05913
			0.4566	0.046					0.4566	0.11652					0.4566	0.05784					0.4566	0.05905
			0.4572	0.046					0.4572	0.11605					0.4572	0.05783					0.4572	0.05897
			0.4578	0.046					0.4578	0.11558					0.4578	0.05781					0.4578	0.0589
			0.4584	0.046					0.4584	0.11511					0.4584	0.05779					0.4584	0.05882
			0.459	0.046					0.459	0.11466					0.459	0.05777					0.459	0.05875
			0.4596	0.046					0.4596	0.1142					0.4596	0.05776					0.4596	0.05868
			0.4602	0.046					0.4602	0.11376					0.4602	0.05774					0.4602	0.05861
			0.4608	0.046					0.4608	0.11332					0.4608	0.05772					0.4608	0.05854
			0.4614	0.046					0.4614	0.11288					0.4614	0.05771					0.4614	0.05847
			0.462	0.046					0.462	0.11245					0.462	0.05769					0.462	0.0584
			0.4626	0.046					0.4626	0.11203					0.4626	0.05768					0.4626	0.05834
			0.4632	0.046					0.4632	0.11161					0.4632	0.05766					0.4632	0.05827
			0.4638	0.046					0.4638	0.1112					0.4638	0.05765					0.4638	0.05821
			0.4644	0.046					0.4644	0.11079					0.4644	0.05763					0.4644	0.05814
			0.465	0.046					0.465	0.11039					0.465	0.05762					0.465	0.05808
			0.4656	0.046					0.4656	0.10999					0.4656	0.0576					0.4656	0.05802
			0.4662	0.046					0.4662	0.1096					0.4662	0.05759					0.4662	0.05796
			0.4668	0.046					0.4668	0.10921					0.4668	0.05757					0.4668	0.05791
			0.4674	0.046					0.4674	0.10883					0.4674	0.05756					0.4674	0.05785
			0.468	0.046					0.468	0.10845					0.468	0.05754					0.468	0.05779
			0.4686	0.046					0.4686	0.10808					0.4686	0.05753					0.4686	0.05774
			0.4692	0.046					0.4692	0.10771					0.4692	0.05751					0.4692	0.05768
			0.4698	0.046					0.4698	0.10734					0.4698	0.0575					0.4698	0.05763
			0.4704	0.046					0.4704	0.10698					0.4704	0.05749					0.4704	0.05758
			0.471	0.046					0.471	0.10663					0.471	0.05747					0.471	0.05753
			0.4716	0.046					0.4716	0.10628					0.4716	0.05746					0.4716	0.05748
			0.4722	0.046					0.4722	0.10593					0.4722	0.05745					0.4722	0.05743
			0.4728	0.046					0.4728	0.10559					0.4728	0.05743					0.4728	0.05738
			0.4734	0.046					0.4734	0.10526					0.4734	0.05742					0.4734	0.05733
			0.474	0.046					0.474	0.10492					0.474	0.05741					0.474	0.05728
			0.4746	0.046					0.4746	0.10459					0.4746	0.0574					0.4746	0.05724
			0.4752	0.046					0.4752	0.10427					0.4752	0.05738					0.4752	0.05719
			0.4758	0.046					0.4758	0.10395					0.4758	0.05737					0.4758	0.05715
			0.4764	0.046					0.4764	0.10363					0.4764	0.05736					0.4764	0.0571
			0.477	0.046					0.477	0.10332					0.477	0.05735					0.477	0.05706
			0.4776	0.046					0.4776	0.10301					0.4776	0.05733					0.4776	0.05702
			0.4782	0.046					0.4782	0.10271					0.4782	0.05732					0.4782	0.05698
			0.4788	0.04599					0.4788	0.10241					0.4788	0.05731					0.4788	0.05694
			0.4794	0.04599					0.4794	0.10211					0.4794	0.0573					0.4794	0.0569
			0.48	0.04599					0.48	0.10182					0.48	0.05729					0.48	0.05686
			0.4806	0.04599					0.4806	0.10153					0.4806	0.05728					0.4806	0.05682
			0.4812	0.04599					0.4812	0.10124					0.4812	0.05726					0.4812	0.05678
			0.4818	0.04599					0.4818	0.10096					0.4818	0.05725					0.4818	0.05674
			0.4824	0.04599					0.4824	0.10068					0.4824	0.05724					0.4824	0.05671
			0.483	0.04599					0.483	0.10041					0.483	0.05723					0.483	0.05667
			0.4836	0.04599					0.4836	0.10014					0.4836	0.05722					0.4836	0.05663
			0.4842	0.04599					0.4842	0.09987					0.4842	0.05721					0.4842	0.0566
			0.4848	0.04599					0.4848	0.0996					0.4848	0.0572					0.4848	0.05656
			0.4854	0.04599					0.4854	0.09934					0.4854	0.05719					0.4854	0.05653
			0.486	0.04599					0.486	0.09908					0.486	0.05718					0.486	0.0565
			0.4866	0.04599					0.4866	0.09883					0.4866	0.05717					0.4866	0.05646
			0.4872	0.04599					0.4872	0.09858					0.4872	0.05716					0.4872	0.05643
			0.4878	0.04599					0.4878	0.09833					0.4878	0.05715					0.4878	0.0564
			0.4884	0.04599					0.4884	0.09808					0.4884	0.05714					0.4884	0.05637
			0.489	0.04599					0.489	0.09784					0.489	0.05713					0.489	0.05634
			0.4896	0.04599					0.4896	0.0976					0.4896	0.05712					0.4896	0.05631
			0.4902	0.04599					0.4902	0.09736					0.4902	0.05711					0.4902	0.05628
			0.4908	0.04599					0.4908	0.09713					0.4908	0.0571					0.4908	0.05625
			0.4914	0.04599					0.4914	0.0969					0.4914	0.05709					0.4914	0.05622
			0.492	0.04599					0.492	0.09667					0.492	0.05708					0.492	0.05619
			0.4926	0.04599					0.4926	0.09645					0.4926	0.05707					0.4926	0.05617
			0.4932	0.04599					0.4932	0.09623					0.4932	0.05706					0.4932	0.05614
			0.4938	0.04599					0.4938	0.09601					0.4938	0.05705					0.4938	0.05611
			0.4944	0.04599					0.4944	0.09579					0.4944	0.05704					0.4944	0.05609
			0.495	0.04599					0.495	0.09558					0.495	0.05704					0.495	0.05606
			0.4956	0.04599					0.4956	0.09537					0.4956	0.05703					0.4956	0.05604
			0.4962	0.04599					0.4962	0.09516					0.4962	0.05702					0.4962	0.05601
			0.4968	0.04599					0.4968	0.09495					0.4968	0.05701					0.4968	0.05599
			0.4974	0.04599					0.4974	0.09475					0.4974	0.057					0.4974	0.05596
			0.498	0.04599					0.498	0.09455					0.498	0.05699					0.498	0.05594
			0.4986	0.04599					0.4986	0.09435					0.4986	0.05698					0.4986	0.05592
			0.4992	0.04599					0.4992	0.09415					0.4992	0.05698					0.4992	0.05589
			0.4998	0.04599					0.4998	0.09396					0.4998	0.05697					0.4998	0.05587
			0.5004	0.04599					0.5004	0.09377					0.5004	0.05696					0.5004	0.05585
			0.501	0.04599					0.501	0.09358					0.501	0.05695					0.501	0.05583
			0.5016	0.04599					0.5016	0.0934					0.5016	0.05694					0.5016	0.0558
			0.5022	0.04599					0.5022	0.09321					0.5022	0.05694					0.5022	0.05578
			0.5028	0.04599					0.5028	0.09303					0.5028	0.05693					0.5028	0.05576
			0.5034	0.04599					0.5034	0.09285					0.5034	0.05692					0.5034	0.05574
			0.504	0.04599					0.504	0.09267					0.504	0.05691					0.504	0.05572
			0.5046	0.04599					0.5046	0.0925					0.5046	0.0569					0.5046	0.0557
			0.5052	0.04599					0.5052	0.09233					0.5052	0.0569					0.5052	0.05568
			0.5058	0.04599					0.5058	0.09216					0.5058	0.05689					0.5058	0.05566
			0.5064	0.04599					0.5064	0.09199					0.5064	0.05688					0.5064	0.05565
			0.507	0.04599					0.507	0.09182					0.507	0.05688					0.507	0.05563
			0.5076	0.04599					0.5076	0.09166					0.5076	0.05687					0.5076	0.05561
			0.5082	0.04599					0.5082	0.09149					0.5082	0.05686					0.5082	0.05559
			0.5088	0.04599					0.5088	0.09133					0.5088	0.05685					0.5088	0.05557
			0.5094	0.04599					0.5094	0.09118					0.5094	0.05685					0.5094	0.05556
			0.51	0.04599					0.51	0.09102					0.51	0.05684					0.51	0.05554
			0.5106	0.04599					0.5106	0.09087					0.5106	0.05683					0.5106	0.05552
			0.5112	0.04599					0.5112	0.09071					0.5112	0.05683					0.5112	0.05551
			0.5118	0.04599					0.5118	0.09056					0.5118	0.05682					0.5118	0.05549
			0.5124	0.04599					0.5124	0.09041					0.5124	0.05681					0.5124	0.05547
			0.513	0.04599					0.513	0.09027					0.513	0.05681					0.513	0.05546
			0.5136	0.04599					0.5136	0.09012					0.5136	0.0568					0.5136	0.05544
			0.5142	0.04599					0.5142	0.08998					0.5142	0.05679					0.5142	0.05543
			0.5148	0.04599					0.5148	0.08984					0.5148	0.05679					0.5148	0.05541
			0.5154	0.04599					0.5154	0.0897					0.5154	0.05678					0.5154	0.0554
			0.516	0.04599					0.516	0.08956					0.516	0.05677					0.516	0.05538
			0.5166	0.04599					0.5166	0.08942					0.5166	0.05677					0.5166	0.05537
			0.5172	0.04599					0.5172	0.08929					0.5172	0.05676					0.5172	0.05535
			0.5178	0.04599					0.5178	0.08915					0.5178	0.05676					0.5178	0.05534
			0.5184	0.04599					0.5184	0.08902					0.5184	0.05675					0.5184	0.05533
			0.519	0.04599					0.519	0.08889					0.519	0.05674					0.519	0.05531
			0.5196	0.04599					0.5196	0.08876					0.5196	0.05674					0.5196	0.0553
			0.5202	0.04599					0.5202	0.08864					0.5202	0.05673					0.5202	0.05529
			0.5208	0.04599					0.5208	0.08851					0.5208	0.05673					0.5208	0.05528
			0.5214	0.04599					0.5214	0.08839					0.5214	0.05672					0.5214	0.05526
			0.522	0.04599					0.522	0.08827					0.522	0.05672					0.522	0.05525
			0.5226	0.04599					0.5226	0.08814					0.5226	0.05671					0.5226	0.05524
			0.5232	0.04599					0.5232	0.08803					0.5232	0.0567					0.5232	0.05523
			0.5238	0.04599					0.5238	0.08791					0.5238	0.0567					0.5238	0.05521
			0.5244	0.04599					0.5244	0.08779					0.5244	0.05669					0.5244	0.0552
			0.525	0.04599					0.525	0.08768					0.525	0.05669					0.525	0.05519
			0.5256	0.04599					0.5256	0.08756					0.5256	0.05668					0.5256	0.05518
			0.5262	0.04599					0.5262	0.08745					0.5262	0.05668					0.5262	0.05517
			0.5268	0.04599					0.5268	0.08734					0.5268	0.05667					0.5268	0.05516
			0.5274	0.04599					0.5274	0.08723					0.5274	0.05667					0.5274	0.05515
			0.528	0.04599					0.528	0.08712					0.528	0.05666					0.528	0.05514
			0.5286	0.04599					0.5286	0.08701					0.5286	0.05666					0.5286	0.05513
			0.5292	0.04599					0.5292	0.08691					0.5292	0.05665					0.5292	0.05512
			0.5298	0.04599					0.5298	0.0868					0.5298	0.05665					0.5298	0.05511
			0.5304	0.04599					0.5304	0.0867					0.5304	0.05664					0.5304	0.0551
			0.531	0.04599					0.531	0.0866					0.531	0.05664					0.531	0.05509
			0.5316	0.04599					0.5316	0.0865					0.5316	0.05663					0.5316	0.05508
			0.5322	0.04599					0.5322	0.0864					0.5322	0.05663					0.5322	0.05507
			0.5328	0.04599					0.5328	0.0863					0.5328	0.05662					0.5328	0.05506
			0.5334	0.04599					0.5334	0.0862					0.5334	0.05662					0.5334	0.05505
			0.534	0.04599					0.534	0.08611					0.534	0.05661					0.534	0.05504
			0.5346	0.04599					0.5346	0.08601					0.5346	0.05661					0.5346	0.05503
			0.5352	0.04599					0.5352	0.08592					0.5352	0.0566					0.5352	0.05502
			0.5358	0.04599					0.5358	0.08583					0.5358	0.0566					0.5358	0.05502
			0.5364	0.04599					0.5364	0.08574					0.5364	0.05659					0.5364	0.05501
			0.537	0.04599					0.537	0.08565					0.537	0.05659					0.537	0.055
			0.5376	0.04599					0.5376	0.08556					0.5376	0.05659					0.5376	0.05499
			0.5382	0.04599					0.5382	0.08547					0.5382	0.05658					0.5382	0.05498
			0.5388	0.04599					0.5388	0.08538					0.5388	0.05658					0.5388	0.05497
			0.5394	0.04599					0.5394	0.0853					0.5394	0.05657					0.5394	0.05497
			0.54	0.04599					0.54	0.08521					0.54	0.05657					0.54	0.05496
			0.5406	0.04599					0.5406	0.08513					0.5406	0.05656					0.5406	0.05495
			0.5412	0.04599					0.5412	0.08504					0.5412	0.05656					0.5412	0.05494
			0.5418	0.04599					0.5418	0.08496					0.5418	0.05656					0.5418	0.05494
			0.5424	0.04599					0.5424	0.08488					0.5424	0.05655					0.5424	0.05493
			0.543	0.04599					0.543	0.0848					0.543	0.05655					0.543	0.05492
			0.5436	0.04599					0.5436	0.08472					0.5436	0.05654					0.5436	0.05492
			0.5442	0.04599					0.5442	0.08464					0.5442	0.05654					0.5442	0.05491
			0.5448	0.04599					0.5448	0.08456					0.5448	0.05654					0.5448	0.0549
			0.5454	0.04599					0.5454	0.08449					0.5454	0.05653					0.5454	0.0549
			0.546	0.04599					0.546	0.08441					0.546	0.05653					0.546	0.05489
			0.5466	0.04599					0.5466	0.08434					0.5466	0.05652					0.5466	0.05488
			0.5472	0.04599					0.5472	0.08426					0.5472	0.05652					0.5472	0.05488
			0.5478	0.04599					0.5478	0.08419					0.5478	0.05652					0.5478	0.05487
			0.5484	0.04599					0.5484	0.08412					0.5484	0.05651					0.5484	0.05486
			0.549	0.04599					0.549	0.08405					0.549	0.05651					0.549	0.05486
			0.5496	0.04599					0.5496	0.08398					0.5496	0.0565					0.5496	0.05485
			0.5502	0.04599					0.5502	0.08391					0.5502	0.0565					0.5502	0.05485
			0.5508	0.04599					0.5508	0.08384					0.5508	0.0565					0.5508	0.05484
			0.5514	0.04599					0.5514	0.08377					0.5514	0.05649					0.5514	0.05483
			0.552	0.04599					0.552	0.0837					0.552	0.05649					0.552	0.05483
			0.5526	0.04599					0.5526	0.08364					0.5526	0.05649					0.5526	0.05482
			0.5532	0.04599					0.5532	0.08357					0.5532	0.05648					0.5532	0.05482
			0.5538	0.04599					0.5538	0.08351					0.5538	0.05648					0.5538	0.05481
			0.5544	0.04599					0.5544	0.08344					0.5544	0.05648					0.5544	0.05481
			0.555	0.04599					0.555	0.08338					0.555	0.05647					0.555	0.0548
			0.5556	0.04599					0.5556	0.08332					0.5556	0.05647					0.5556	0.0548
			0.5562	0.04599					0.5562	0.08326					0.5562	0.05647					0.5562	0.05479
			0.5568	0.04599					0.5568	0.08319					0.5568	0.05646					0.5568	0.05479
			0.5574	0.04599					0.5574	0.08313					0.5574	0.05646					0.5574	0.05478
			0.558	0.04599					0.558	0.08307					0.558	0.05646					0.558	0.05478
			0.5586	0.04599					0.5586	0.08301					0.5586	0.05645					0.5586	0.05477
			0.5592	0.04599					0.5592	0.08296					0.5592	0.05645					0.5592	0.05477
			0.5598	0.04599					0.5598	0.0829					0.5598	0.05645					0.5598	0.05476
			0.5604	0.04599					0.5604	0.08284					0.5604	0.05644					0.5604	0.05476
			0.561	0.04599					0.561	0.08279					0.561	0.05644					0.561	0.05475
			0.5616	0.04599					0.5616	0.08273					0.5616	0.05644					0.5616	0.05475
			0.5622	0.04599					0.5622	0.08267					0.5622	0.05643					0.5622	0.05474
			0.5628	0.04599					0.5628	0.08262					0.5628	0.05643					0.5628	0.05474
			0.5634	0.04599					0.5634	0.08257					0.5634	0.05643					0.5634	0.05474
			0.564	0.04599					0.564	0.08251					0.564	0.05643					0.564	0.05473
			0.5646	0.04599					0.5646	0.08246					0.5646	0.05642					0.5646	0.05473
			0.5652	0.04599					0.5652	0.08241					0.5652	0.05642					0.5652	0.05472
			0.5658	0.04599					0.5658	0.08236					0.5658	0.05642					0.5658	0.05472
			0.5664	0.04599					0.5664	0.08231					0.5664	0.05641					0.5664	0.05472
			0.567	0.04599					0.567	0.08226					0.567	0.05641					0.567	0.05471
			0.5676	0.04599					0.5676	0.08221					0.5676	0.05641					0.5676	0.05471
			0.5682	0.04599					0.5682	0.08216					0.5682	0.05641					0.5682	0.0547
			0.5688	0.04599					0.5688	0.08211					0.5688	0.0564					0.5688	0.0547
			0.5694	0.04599					0.5694	0.08206					0.5694	0.0564					0.5694	0.0547
			0.57	0.04599					0.57	0.08201					0.57	0.0564					0.57	0.05469
			0.5706	0.04599					0.5706	0.08197					0.5706	0.0564					0.5706	0.05469
			0.5712	0.04599					0.5712	0.08192					0.5712	0.05639					0.5712	0.05469
			0.5718	0.04599					0.5718	0.08187					0.5718	0.05639					0.5718	0.05468
			0.5724	0.04599					0.5724	0.08183					0.5724	0.05639					0.5724	0.05468
			0.573	0.04599					0.573	0.08178					0.573	0.05638					0.573	0.05468
			0.5736	0.04599					0.5736	0.08174					0.5736	0.05638					0.5736	0.05467
			0.5742	0.04599					0.5742	0.0817					0.5742	0.05638					0.5742	0.05467
			0.5748	0.04599					0.5748	0.08165					0.5748	0.05638					0.5748	0.05467
			0.5754	0.04599					0.5754	0.08161					0.5754	0.05637					0.5754	0.05466
			0.576	0.04599					0.576	0.08157					0.576	0.05637					0.576	0.05466
			0.5766	0.04599					0.5766	0.08152					0.5766	0.05637					0.5766	0.05466
			0.5772	0.04599					0.5772	0.08148					0.5772	0.05637					0.5772	0.05465
			0.5778	0.04599					0.5778	0.08144					0.5778	0.05636					0.5778	0.05465
			0.5784	0.04599					0.5784	0.0814					0.5784	0.05636					0.5784	0.05465
			0.579	0.04599					0.579	0.08136					0.579	0.05636					0.579	0.05464
			0.5796	0.04599					0.5796	0.08132					0.5796	0.05636					0.5796	0.05464
			0.5802	0.04599					0.5802	0.08128					0.5802	0.05636					0.5802	0.05464
			0.5808	0.04599					0.5808	0.08124					0.5808	0.05635					0.5808	0.05464
			0.5814	0.04599					0.5814	0.08121					0.5814	0.05635					0.5814	0.05463
			0.582	0.04599					0.582	0.08117					0.582	0.05635					0.582	0.05463
			0.5826	0.04599					0.5826	0.08113					0.5826	0.05635					0.5826	0.05463
			0.5832	0.04599					0.5832	0.08109					0.5832	0.05634					0.5832	0.05463
			0.5838	0.04599					0.5838	0.08106					0.5838	0.05634					0.5838	0.05462
			0.5844	0.04599					0.5844	0.08102					0.5844	0.05634					0.5844	0.05462
			0.585	0.04599					0.585	0.08099					0.585	0.05634					0.585	0.05462
			0.5856	0.04599					0.5856	0.08095					0.5856	0.05634					0.5856	0.05462
			0.5862	0.04599					0.5862	0.08092					0.5862	0.05633					0.5862	0.05461
			0.5868	0.04599					0.5868	0.08088					0.5868	0.05633					0.5868	0.05461
			0.5874	0.04599					0.5874	0.08085					0.5874	0.05633					0.5874	0.05461
			0.588	0.04599					0.588	0.08081					0.588	0.05633					0.588	0.05461
			0.5886	0.04599					0.5886	0.08078					0.5886	0.05632					0.5886	0.0546
			0.5892	0.04599					0.5892	0.08075					0.5892	0.05632					0.5892	0.0546
			0.5898	0.04599					0.5898	0.08071					0.5898	0.05632					0.5898	0.0546
			0.5904	0.04599					0.5904	0.08068					0.5904	0.05632					0.5904	0.0546
			0.591	0.04599					0.591	0.08065					0.591	0.05632					0.591	0.05459
			0.5916	0.04599					0.5916	0.08062					0.5916	0.05631					0.5916	0.05459
			0.5922	0.04599					0.5922	0.08059					0.5922	0.05631					0.5922	0.05459
			0.5928	0.04599					0.5928	0.08055					0.5928	0.05631					0.5928	0.05459
			0.5934	0.04599					0.5934	0.08052					0.5934	0.05631					0.5934	0.05459
			0.594	0.04599					0.594	0.08049					0.594	0.05631					0.594	0.05458
			0.5946	0.04599					0.5946	0.08046					0.5946	0.05631					0.5946	0.05458
			0.5952	0.04599					0.5952	0.08043					0.5952	0.0563					0.5952	0.05458
			0.5958	0.04599					0.5958	0.0804					0.5958	0.0563					0.5958	0.05458
			0.5964	0.04599					0.5964	0.08038					0.5964	0.0563					0.5964	0.05458
			0.597	0.04599					0.597	0.08035					0.597	0.0563					0.597	0.05457
			0.5976	0.04599					0.5976	0.08032					0.5976	0.0563					0.5976	0.05457
			0.5982	0.04599					0.5982	0.08029					0.5982	0.05629					0.5982	0.05457
			0.5988	0.04599					0.5988	0.08026					0.5988	0.05629					0.5988	0.05457
			0.5994	0.04599					0.5994	0.08024					0.5994	0.05629					0.5994	0.05457
